# Supplementary material
Source: bioRxiv or medRxiv preprint supplement (https://www.medrxiv.org/highwire/filestream/71327/field_highwire_adjunct_files/0/19009977-1.pdf)
Supplement: Supplementary file [file 19009977-1.pdf]

Supplementary information for Evaluating the  
cost-effectiveness of the next generation of RSV intervention  
strategies

by David Hodgson, Richard Pebody, Jasmina Panovska-Griffiths, Marc Baguelin,  
and Katherine Atkins

# Contents

|                                                                 |           |
|-----------------------------------------------------------------|-----------|
| <b>S1 Supplementary information 1:</b>                          |           |
| <b>Methods</b>                                                  | <b>4</b>  |
| S1.1 RSV model structure . . . . .                              | 5         |
| S1.1.1 Maternal protection model . . . . .                      | 7         |
| S1.1.2 Contact matrices . . . . .                               | 8         |
| S1.1.3 Force of infection . . . . .                             | 10        |
| S1.1.4 Initial conditions . . . . .                             | 10        |
| S1.1.5 Model output . . . . .                                   | 11        |
| S1.2 Parameterisation of prior distributions . . . . .          | 12        |
| S1.2.1 Duration of immunity . . . . .                           | 12        |
| S1.2.2 Duration of symptomatic infection . . . . .              | 12        |
| S1.2.3 Susceptibility to infection . . . . .                    | 13        |
| S1.2.4 Asymptomatic infection . . . . .                         | 13        |
| S1.2.5 Transmission and initial parameters . . . . .            | 13        |
| S1.3 Model-fitting . . . . .                                    | 15        |
| S1.3.1 Detection model . . . . .                                | 15        |
| S1.3.2 Calibration . . . . .                                    | 17        |
| S1.3.3 Model choice . . . . .                                   | 18        |
| S1.3.4 Posterior distributions . . . . .                        | 18        |
| S1.3.5 Implementation . . . . .                                 | 18        |
| S1.4 Intervention model . . . . .                               | 20        |
| S1.4.1 Palivizumab programme . . . . .                          | 20        |
| S1.4.2 Long-acting monoclonal antibodies programmes . . . . .   | 23        |
| S1.4.3 Childhood/elderly vaccination programmes . . . . .       | 26        |
| S1.4.4 Maternal vaccine programmes . . . . .                    | 29        |
| S1.5 Economic model . . . . .                                   | 34        |
| S1.5.1 Estimating annual incidence of outcomes . . . . .        | 34        |
| S1.5.2 QALY loss due to death . . . . .                         | 35        |
| S1.5.3 Cost-effectiveness . . . . .                             | 35        |
| <b>S2 Supplementary information 2:</b>                          |           |
| <b>Results</b>                                                  | <b>37</b> |
| S2.1 Model choice . . . . .                                     | 38        |
| S2.2 RSV Epidemiology . . . . .                                 | 40        |
| S2.2.1 Estimated incidence . . . . .                            | 40        |
| S2.2.2 Posterior distributions of epidemic parameters . . . . . | 42        |
| S2.3 Probability of clinical outcomes . . . . .                 | 43        |
| S2.4 Impact of intervention programmes . . . . .                | 44        |
| S2.4.1 Optimal period of administration . . . . .               | 44        |

S2.4.2 Outcomes averted . . . . . 45

# **S1. Supplementary information 1: Methods**

## S1.1 RSV model structure

| State    | Description                                                                                                                                                                                                            |
|----------|------------------------------------------------------------------------------------------------------------------------------------------------------------------------------------------------------------------------|
| $M(t)$   | Number of individuals at time $t$ who are completely protected from infection due to maternally-derived antibodies.                                                                                                    |
| $S_i(t)$ | Number of individuals at time $t$ who are susceptible to acquiring an RSV infection, who have experienced $i$ previous infections.                                                                                     |
| $E_i(t)$ | Number of individuals at time $t$ who are infected with RSV but are not yet infectious (i.e. exposed), who have experienced $i$ previous infections.                                                                   |
| $A_i(t)$ | Number of individuals at time $t$ who are infected with RSV, infectious and have no symptoms of RSV-related respiratory disease, who have experienced $i$ previous infections (not including the current infection).   |
| $I_i(t)$ | Number of individuals at time $t$ who are both infected with RSV, infectious and have symptoms of RSV-related respiratory illness, who have experienced $i$ previous infections (not including the current infection). |
| $R_i(t)$ | Number of individuals at time $t$ who are completely protected from infection due to immunity acquired from natural-infection, who have experienced $i$ infections (not including the one just experienced).           |
| $Z(t)$   | Cumulative number of new RSV infections at time $t$                                                                                                                                                                    |
| $V_P(t)$ | Number of individuals at time $t$ who are completely protected from infection due to immunity acquired from administration of Palivizumab.                                                                             |
| $V_M(t)$ | Number of individuals at time $t$ who are completely protected from infection due to immunity acquired from administration of long-acting monoclonal antibodies.                                                       |

**Table S1.1:** Description of the epidemiological state variables of the RSV model, where  $i \in \{0, 1, 2, 3\}$ .

| State     | Description                                                                                                                   |
|-----------|-------------------------------------------------------------------------------------------------------------------------------|
| $\eta^a$  | Ageing rate from age group $a$ to age group $a + 1$ .                                                                         |
| $p^{a,b}$ | Total number of daily physical contacts made by age group $a$ with age group $b$ .                                            |
| $c^{a,b}$ | Total number of daily conversational contacts made by age group $a$ with age group $b$ .                                      |
| $I_1$     | Initial proportion (at $t = 0$ ) of people who are infected (i.e. in epidemiological compartments $E$ , $I$ or $A$ ) with RSV |
| $I_2$     | Initial proportion (at $t = 0$ ) of people who not-infected but are protected (in epidemiological compartment $R$ ) from RSV  |

**Table S1.2:** Description of additional epidemiological parameters in the RSV model which are not included in **Table 1** of the main text.

In order to capture the heterogeneity in transmissive capacity across the population, we stratified the model into demographic groups according to their age (indicated by the superscript  $a$ ). 25 age groups were considered, allowing for the dynamics of RSV incidence in infants to be closely monitored (age groups: <1, 1, 2, 3, 4, 5, 6, 7, 8, 9, 10, 11 months, and 1, 2, 3, 4, 5, 5–9, 10–14, 15–24, 25–34, 35–44, 45–54, 55–64, 65–74, 75+ years). The number of individuals,  $N^a$ , in each age group age,  $a$ , is calculated by multiplying the daily birth rate in 2018 for England and Wales,  $\mu$ , by the number of days spent in each age group ( $d_a$ ). Individuals in an epidemic compartment move to the next age group ( $X^a \rightarrow X^{a+1}$ ) at rate  $\eta^a = 1/(365 d_a)$ .<sup>1</sup>

The ODEs of the RSV transmission model for age group  $a$  are:

$$\begin{array}{l}
 \dot{M}^a = \overbrace{p_R \mu \mathbb{1}_1(a) - \xi M^a}^{\text{Transmission terms}} \quad \quad \quad \overbrace{-\eta^a M^a + \eta^{a-1} M^{a-1}}^{\text{Ageing terms}} \\
 \dot{S}_0^a = (1 - p_R) \mu \mathbb{1}_1(a) + \xi M^a - \lambda_0^a(t) S_0^a \quad \quad \quad -\eta^a S_0^a + \eta^{a-1} S_0^{a-1} \\
 \dot{E}_0^a = \lambda_0^a(t) S_0^{a,s} - \sigma E_0^a \quad \quad \quad -\eta^a E_0^a + \eta^{a-1} E_0^{a-1} \\
 \dot{A}_0^a = p^a \sigma E_0^a - \gamma_0 A_0^a \quad \quad \quad -\eta^a A_0^a + \eta^{a-1} A_0^{a-1} \\
 \dot{I}_0^a = (1 - p^a) \sigma E_0^a - \gamma_0 I_0^a \quad \quad \quad -\eta^a I_0^a + \eta^{a-1} I_0^{a-1} \\
 \dot{R}_0^a = \gamma_0 A_0^a + \gamma_0 I_0^a - \omega R_0^a \quad \quad \quad -\eta^a R_0^a + \eta^{a-1} R_0^{a-1} \\
 \dot{S}_1^a = \omega R_0^a - \lambda_1^a(t) S_1^a \quad \quad \quad -\eta^a S_1^a + \eta^{a-1} S_1^{a-1} \\
 \dot{E}_1^a = \lambda_1^a(t) S_1^a - \sigma E_1^a \quad \quad \quad -\eta^a E_1^a + \eta^{a-1} E_1^{a-1} \\
 \dot{A}_1^a = p^a \sigma E_1^a - \gamma_1 A_1^a \quad \quad \quad -\eta^a A_1^a + \eta^{a-1} A_1^{a-1} \\
 \dot{I}_1^a = (1 - p^a) \sigma E_1^a - \gamma_1 I_1^a \quad \quad \quad -\eta^a I_1^a + \eta^{a-1} I_1^{a-1} \\
 \dot{R}_1^a = \gamma_1 A_1^a + \gamma_1 I_1^a - \omega R_1^a \quad \quad \quad -\eta^a R_1^a + \eta^{a-1} R_1^{a-1} \\
 \dot{S}_2^a = \omega R_1^a - \lambda_2^a(t) S_2^a \quad \quad \quad -\eta^a S_2^a + \eta^{a-1} S_2^{a-1} \\
 \dot{E}_2^a = \lambda_2^a(t) S_2^a - \sigma E_2^a \quad \quad \quad -\eta^a E_2^a + \eta^{a-1} E_2^{a-1} \\
 \dot{A}_2^a = p^a \sigma E_2^a - \gamma_2 A_2^a \quad \quad \quad -\eta^a A_2^a + \eta^{a-1} A_2^{a-1} \\
 \dot{I}_2^a = (1 - p^a) \sigma E_2^a - \gamma_2 I_2^a \quad \quad \quad -\eta^a I_2^a + \eta^{a-1} I_2^{a-1} \\
 \dot{R}_2^a = \gamma_2 A_2^a + \gamma_2 I_2^a - \omega R_2^a \quad \quad \quad -\eta^a R_2^a + \eta^{a-1} R_2^{a-1} \\
 \dot{S}_3^a = \omega R_2^a + \omega R_3^a - \lambda_3^a(t) S_3^a \quad \quad \quad -\eta^a S_3^a + \eta^{a-1} S_3^{a-1} \\
 \dot{E}_3^a = \lambda_3^a(t) S_3^a - \sigma E_3^a \quad \quad \quad -\eta^a E_3^a + \eta^{a-1} E_3^{a-1} \\
 \dot{A}_3^a = p^a \sigma E_3^a - \gamma_3 A_3^a \quad \quad \quad -\eta^a A_3^a + \eta^{a-1} A_3^{a-1} \\
 \dot{I}_3^a = (1 - p^a) \sigma E_3^a - \gamma_3 I_3^a \quad \quad \quad -\eta^a I_3^a + \eta^{a-1} I_3^{a-1} \\
 \dot{R}_3^a = \gamma_3 A_3^a + \gamma_3 I_3^a - \omega R_3^a \quad \quad \quad -\eta^a R_3^a + \eta^{a-1} R_3^{a-1} \\
 \dot{Z}^a = \sigma(E_0^a + E_1^a + E_2^a + E_3^a)
 \end{array} \tag{S1.1}$$

where an overdot refers to differentiation with respect to  $t$ ,  $\mathbb{1}_1(a)$  is the indicator function (non-zero at  $a = 1$ ). The value of  $p_R$  depends on the maternal protection model (see **Section S1.1.1**) and  $\lambda_i^a(t)$  is the force of infection for age group  $a$  (see **Section S1.1.3**). A schematic showing the relationship between each of the epidemiological states variables and the epidemiological parameters is given in **Figure S1.1**.

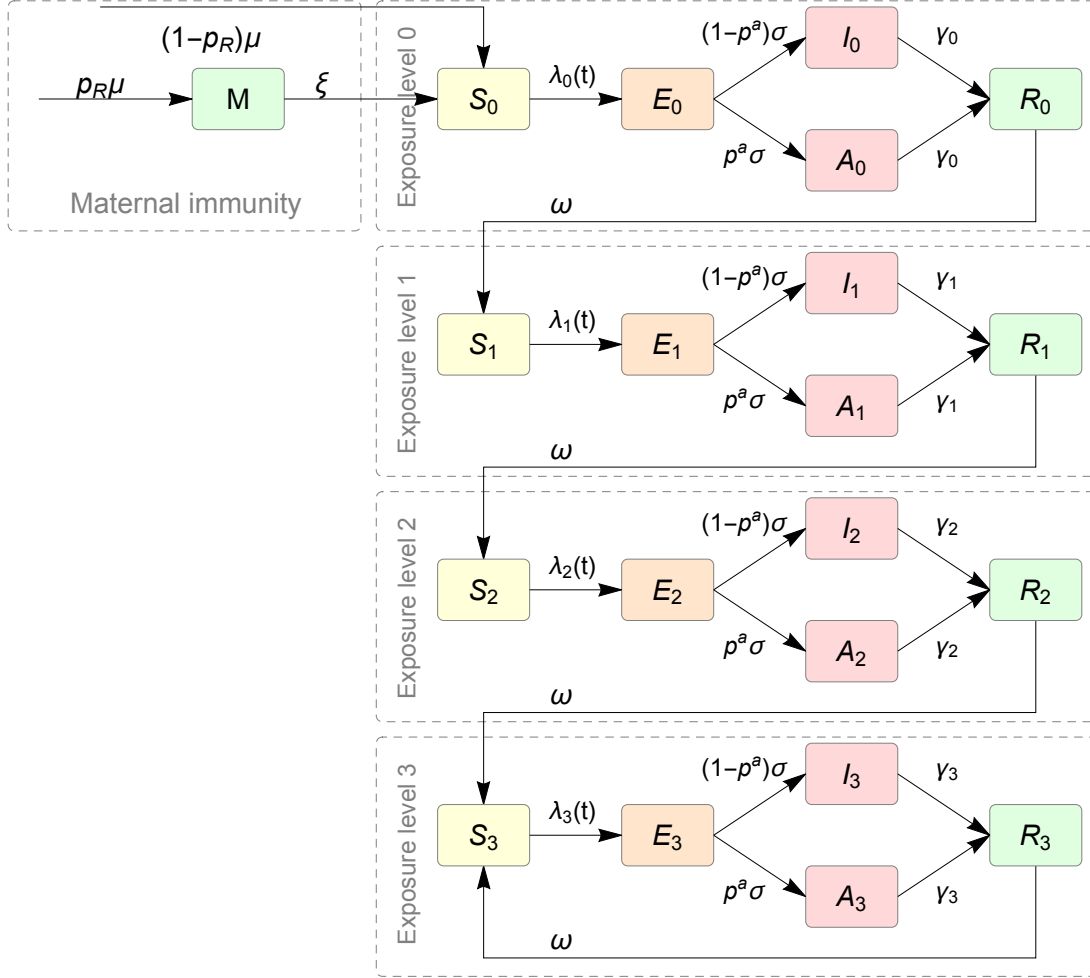

**Figure S1.1:** The relationship between the epidemic model state variables ( $M$ : protected due to maternal antibodies,  $S$ : susceptible,  $E$ : exposed but not infectious,  $I$ : infectious and symptomatic,  $A$ : infectious and asymptomatic,  $R$ : recovered and protected) for each of the four exposure levels (subscript  $i = 0, 1, 2, 3$ ). For maternal immunity, the parameters are  $\mu$  the daily birth rate,  $p_R$  the proportion of neonates born with protection and  $\xi$  the rate of loss maternal immunity. For each exposure level  $i$ ,  $\lambda_i$  is the force of infection,  $\sigma$  is the rate of loss exposure to infection,  $p^a$  is the probability that an RSV infection is asymptomatic in age group  $a$ ,  $\gamma_i$  is the rate of loss of infectiousness, and  $\omega$  is the rate of loss of post-infection immunity.

### S1.1.1 Maternal protection model

We considered two different model structures to capture the dynamics of maternal protection. The first, static immunity model,  $\mathcal{M}^1$ , assumes that all neonates are born with protection, ( $p_R = 1$ ). The second, dynamic immunity model  $\mathcal{M}^2$ , assumes that the proportion of infants born with protection is equal to the proportion of women of child bearing age (15-44 years) who are in epidemiological state,  $R$  at time  $t$ ,  $p_R(t) = \frac{\sum_{a=19}^{21} R^a(t)}{\sum_{a=19}^{21} N^a}$  under the observation that cord titre changes in neonates seasonally, which could influence susceptibility to infection (**Figure S1.2**).<sup>2</sup>

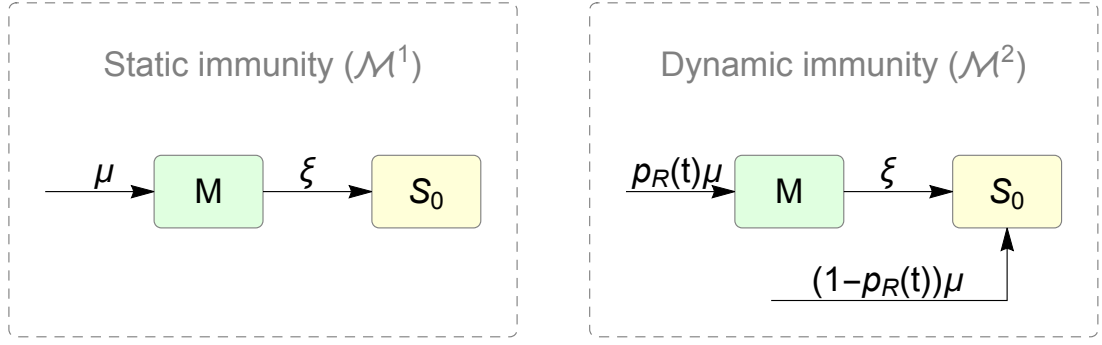

**Figure S1.2:** Two models of maternal protection where  $\mu$  is the daily birth rate,  $\xi$  is the rate of loss of maternal-derived immunity, and  $p_R(t)$  is the proportion of infants born with protection at time  $t$ .

### S1.1.2 Contact matrices

To estimate the number of contacts between age group  $a$  and  $b$ , we combined the results of two contact surveys. The first study (Study A), was conducted as part of the EU funded POLYMOD study—a large pan-European survey with 7,290 participants who recorded 97,904 contacts across all age groups.<sup>3</sup> The second study (Study B), is a smaller study in the United Kingdom with 122 number of participants (all under the age of one year) who recorded 758 contacts.<sup>4</sup> Both studies provided estimates for the number of daily household/non-household contacts and daily physical/conversational contacts made between each age group. Therefore, to estimate the total number of daily physical/conversational contacts made between age group  $a$  and  $b$ , ( $\mathbf{p}^{a,b}$  and  $\mathbf{c}^{a,b}$  respectively), we used Study A for participants less than 1 years of age, and Study B for older participants. To ensure this symmetry occurs in the contact matrices, we calculated the weighted mean number of contacts made between age  $a$  to age group  $b$  for conversational contacts (same formula for physical contacts) as:

$$\mathbf{c}^{a,b} \leftarrow \frac{1}{N^a + N^b} (\mathbf{c}^{a,b} N^a + \mathbf{c}^{b,a} N^b)$$

where  $N^a$  is the population size for age group  $a$ . The resulting symmetric contact matrices for  $\mathbf{p}^{a,b}$ ,  $\mathbf{c}^{a,b}$  are plotted in **Figure S1.3**.



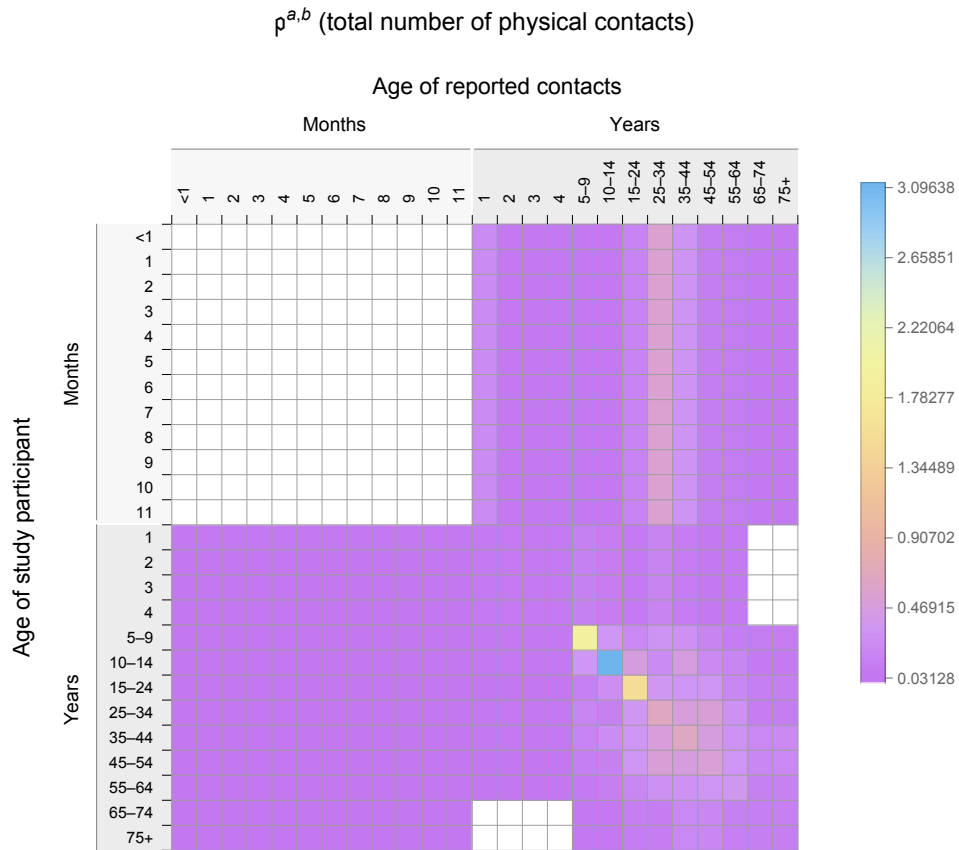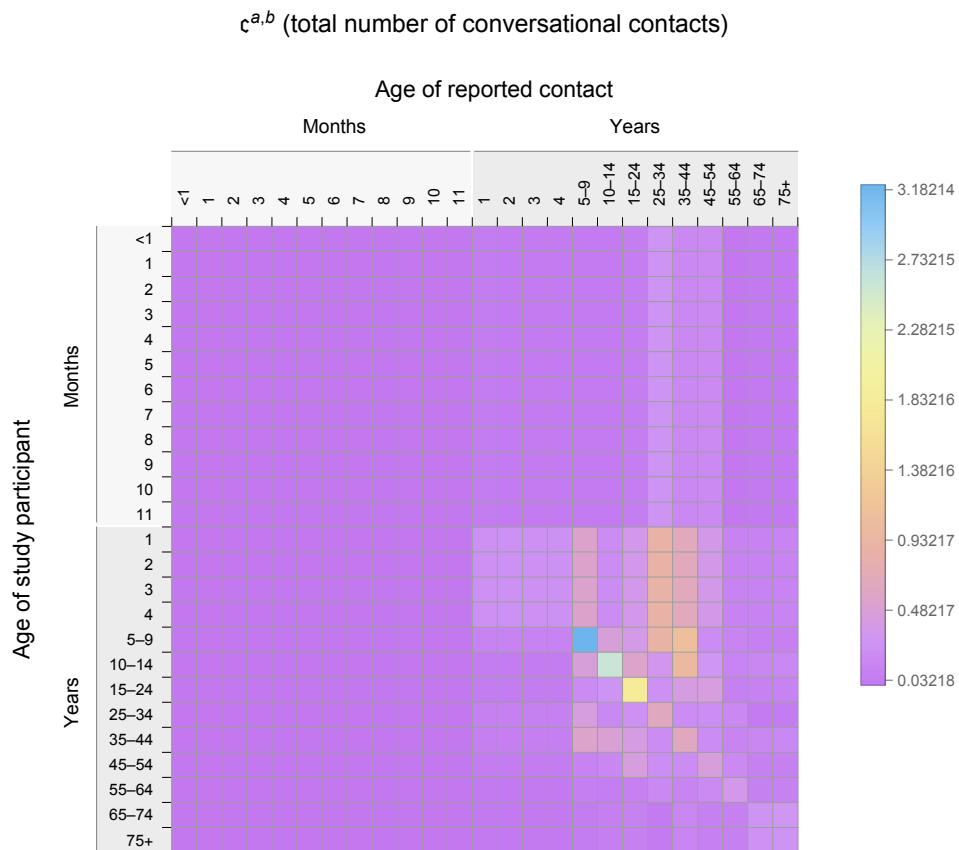

**Figure S1.3:** Top: Number of daily physical contacts made between age group  $a$  and age group  $b$ . Bottom: Number of daily conversational contacts made between age group  $a$  and age group  $b$ .



The equations for the initial conditions are:

$$\begin{aligned}
 M^a(0) &= Np_\xi^a \\
 S_0^a(0) &= \left[ N(1-p_\xi^a)p_0^a \right] (1-l_1)(1-l_2) & E_0^a(0) &= \left[ N(1-p_\xi^a)p_0^a \right] \left( \frac{\sigma}{\gamma_0+\sigma} \right) l_1 \\
 A_0^a(0) &= \left[ N(1-p_\xi^a)p_0^a \right] \left( \frac{\gamma_0}{\gamma_0+\sigma} \right) (p^a)l_1 & I_0^a(0) &= \left[ N(1-p_\xi^a)p_0^a \right] \left( \frac{\gamma_0}{\gamma_0+\sigma} \right) (1-p^a)l_1 \\
 R_0^a(0) &= \left[ N(1-p_\xi^a)p_0^a \right] (1-l_1)l_2 \\
 S_1^a(0) &= \left[ N(1-p_\xi^a)p_1^a \right] (1-\delta_1l_1)(1-l_2) & E_1^a(0) &= \left[ N(1-p_\xi^a)p_1^a \right] \left( \frac{\sigma}{\gamma_1+\sigma} \right) \delta_1l_1 \\
 A_1^a(0) &= \left[ N(1-p_\xi^a)p_1^a \right] \left( \frac{\gamma_1}{\gamma_1+\sigma} \right) (p^a)\delta_1l_1 & I_1^a(0) &= \left[ N(1-p_\xi^a)p_1^a \right] \left( \frac{\gamma_1}{\gamma_1+\sigma} \right) (1-p^a)\delta_1l_1 \\
 R_1^a(0) &= \left[ N(1-p_\xi^a)p_1^a \right] (1-\delta_1l_1)l_2 \\
 S_2^a(0) &= \left[ N(1-p_\xi^a)p_2^a \right] (1-\delta_2l_1)(1-l_2) & E_2^a(0) &= \left[ N(1-p_\xi^a)p_2^a \right] \left( \frac{\sigma}{\gamma_2+\sigma} \right) \delta_2l_1 \\
 A_2^a(0) &= \left[ N(1-p_\xi^a)p_2^a \right] \left( \frac{\gamma_2}{\gamma_2+\sigma} \right) (p^a)\delta_2l_1 & I_2^a(0) &= \left[ N(1-p_\xi^a)p_2^a \right] \left( \frac{\gamma_2}{\gamma_2+\sigma} \right) (1-p^a)\delta_2l_1 \\
 R_2^a(0) &= \left[ N(1-p_\xi^a)p_2^a \right] (1-\delta_2l_1)l_2 \\
 S_3^a(0) &= \left[ N(1-p_\xi^a)p_3^a \right] (1-\delta_3l_1)(1-l_2) & E_3^a(0) &= \left[ N(1-p_\xi^a)p_3^a \right] \left( \frac{\sigma}{\gamma_3+\sigma} \right) \delta_3l_1 \\
 A_3^a(0) &= \left[ N(1-p_\xi^a)p_3^a \right] \left( \frac{\gamma_3}{\gamma_3+\sigma} \right) (p^a)\delta_3l_1 & I_3^a(0) &= \left[ N(1-p_\xi^a)p_3^a \right] \left( \frac{\gamma_3}{\gamma_3+\sigma} \right) (1-p^a)\delta_3l_1 \\
 R_3^a(0) &= \left[ N(1-p_\xi^a)p_3^a \right] (1-\delta_3l_1)l_2 & Z^a(0) &= 0
 \end{aligned} \tag{S1.3}$$

where  $N = N^a$ ; the equation for  $p_\xi^a$ , the initial proportion of persons in age group,  $a$  (age range,  $[n^{a-1}, n^a]$ ,  $n^{a-1} < n^a$ ) who still have maternal protection given a rate of loss of maternal protection parameter,  $\xi$ , is:

$$p_\xi^a = \frac{1}{(n^a - n^{a-1})} \int_{n^{a-1}}^{n^a} \exp(-365\xi x) dx \tag{S1.4}$$

and the equations for  $p_k^a$ , the initial proportion of persons in age group  $a$  who have experienced  $k$  number of previous infections assuming no cumulative protection follows a Poisson distribution, is:

$$\begin{aligned}
 p_k^a &= \frac{1}{(n^a - n^{a-1})} \int_{n^{a-1}}^{n^a} \frac{(x)^k \exp(-x)}{k!} dx, \quad k = 0, 1, 2 \\
 p_3^a &= 1 - (p_0^j + p_1^j + p_2^j)
 \end{aligned} \tag{S1.5}$$

### S1.1.5 Model output

The output of the epidemic model is the number of new infections  $Z_{w_t}^{\mathcal{M}^m, a}$  in age group  $a$ , maternal model  $m$ , per week  $w_t$  and the formula is:

$$Z_{w_t}^{\mathcal{M}^m, a} = \frac{Z^{\mathcal{M}^m, a}(t)}{dt} \Big|_{t=w_{k-1}}^{t=w_k} \tag{S1.6}$$

where  $Z^{\mathcal{M}^m, a}(t)$  is the cumulative number of new infections at time  $t$  under maternal immunity model  $m$ .

## S1.2 Parameterisation of prior distributions

### S1.2.1 Duration of immunity

It is unclear what the period of naturally-acquired immunity is for RSV, however, observational cohort studies suggest that reinfection is possible after 60 days and it is also reasonable to assume that some hosts are susceptible again at the start of an RSV season (on average 200 days later).<sup>5,6</sup> Therefore, we assumed the prior distribution for the duration of protection of  $\mathcal{N}(130, 35)$  so that the 95% CI corresponds with 60 and 200 days. For duration of maternal protection, having a higher baseline cord blood antibody level for RSV at birth provides i) a significant decrease in disease incidence during in the first 6 months of life<sup>7-9</sup> and ii) a decrease in risk of hospital admission.<sup>2</sup> Therefore, we assumed the duration of maternal protection can be no shorter than 14 days and no longer than 6 months, giving a prior of  $\mathcal{U}(14, 180)$ .

### S1.2.2 Duration of symptomatic infection

For the prior for the duration of the latency period ( $1/\sigma$ ), we used an experimental challenge study<sup>10</sup> to estimate the mean and standard deviation as 4.0 and 1.5 days respectively. Using the formula

$$\text{Gamma}\left(\frac{\mu^2}{s^2}, \frac{s^2}{\mu}\right) \quad (\text{S1.7})$$

where  $\mu$  is the mean and  $s^2$  is the variance, the fitted distribution for  $1/\sigma$  is  $\text{Gamma}(7.111, 0.563)$ . To ensure that the duration of infection decreased with repeated exposure, we found prior distributions for the duration of primary infection,  $1/\gamma_0$ , and the decrease in duration of infection relative to the previous infection,  $g_i$  such that  $\gamma_1 \equiv \gamma_0(g_1)^{-1}$ ,  $\gamma_2 \equiv \gamma_0(g_1g_2)^{-1}$ , and  $\gamma_3 \equiv \gamma_0(g_1g_2g_3)^{-1}$ . The mean and 95% confidence interval for primary and subsequent infection from a prospective cohort study were the convolution distributions:<sup>11</sup>  $5.1$  (95% CI 4.2–6.2) +  $\mathcal{U}(0, 7)$  and  $4.0$  (95% CI 3.3–4.9) +  $\mathcal{U}(0, 7)$  respectively where the uniform distribution arises to account for left-censoring in weekly collection protocol. The empirical sample for the prior distributions for  $1/\gamma_0$  is found by sampling from  $5.1$  (95% CI 4.2–6.2) +  $\mathcal{U}(0, 7)$  and fitting the sample to a probability distribution. The method of fitting an empirical sample to a probability distribution, we refer to as **Fitting procedure 1**:

**Fitting procedure 1** To fit an empirical distribution to a probability distribution we use the maximum likelihood method to estimate the parameters of the i)  $\text{Gamma}(k, \theta)$ , ii)  $\mathcal{LN}(\mu, \sigma)$ , and iii)  $W(\lambda, k)$ , and choose the probability distribution with the highest likelihood.

**Fitting procedure 1** gives a probability distribution of  $W(4.137, 8.303)$  for  $1/\gamma_0$ . For  $g_1$  we divided the samples from  $5.1$  (95% CI 4.2–6.2) +  $\mathcal{U}(0, 7)$  by the samples from  $4.0$  (95% CI 3.3–4.9) +  $\mathcal{U}(0, 7)$  and used **Fitting Procedure 1** on the resulting sample to get a probability distribution of  $W(34.224, 0.879)$  for  $g_1$ . For  $g_2$ , we used an experimental reinfection study<sup>10</sup> to find a mean and standard deviation for  $\gamma_2$  of 3.6 and 1.1 days respectively ( $\text{Gamma}(10.71, 0.34)$  from **Equation S1.7**). Dividing ordered samples from this distribution by the ordered empirical sample for  $\gamma_0$  multiplied by  $(g_1)^{-1}$  gives an empirical sample for the prior distribution for  $g_2$  which, from **Fitting procedure 1**, has a probability distribution  $\mathcal{LN}(-0.561, 0.163)$ . As there is no evidence to suggest the duration of infection decreases further after tertiary infection,  $g_3 = 1$ .

### S1.2.3 Susceptibility to infection

The prior distribution for the reduction in susceptibility to infection,  $\delta_i$ , assuming  $i$  number of previous infections, is determined using two prospective cohort studies<sup>12,13</sup> which estimated the average proportion of individuals who become infected when challenged with RSV for secondary, tertiary and subsequent infections, relative to their previous infection, as 0.757, 0.878 and 0.322 respectively (with sample sizes of 47, 26 and 19). Using the formula

$$\mathcal{B}(\mu n, (1 - \mu)n) \tag{S1.8}$$

where  $\mu$  is the mean, and  $n$  is the sample size, we estimated the probability distributions for these observations as  $\mathcal{B}(35.583, 11.417)$ ,  $\mathcal{B}(22.8293.171)$  and  $\mathcal{B}(6.117, 12.882)$  for susceptibility to secondary and tertiary and subsequent infection, relative to previous infection.

### S1.2.4 Asymptomatic infection

The proportion of infections which are asymptomatic is estimated from a prospective cohort study<sup>14</sup> which showed, for ages <1, 1-4, 5-14, and 15 years and over, the mean probability of asymptomatic infection is 0.091, 0.173, 0.521, and 0.765, for the sample sizes is 33, 52, 73, and 47 respectively (giving  $\mathcal{B}(3.003, 29.997)$ ,  $\mathcal{B}(8.996, 43.004)$ ,  $\mathcal{B}(38.033, 34.967)$  and  $\mathcal{B}(35.955, 11.045)$  from the formula **Equation S1.8**). Though exiting studies have estimated the difference in viral load and the duration of shedding between asymptomatic and symptomatic infection, it is unclear how these differences alter the infectiousness of a host.<sup>14</sup> Therefore, as there is no strong evidence otherwise, we assumed the prior distributions for  $\alpha$  of  $\mathcal{U}(0, 1)$ .

### S1.2.5 Transmission and initial parameters

Finally, as they cannot be estimated from epidemiological data, the prior distributions for the transmission probability per contact physical contact  $q_p$ , relative reduction in transmission due to conversational contact  $q_c$ , the relative seasonal amplitude  $b_1$ , the offset  $\phi$  and the width of heightened transmissive season  $\psi$  all have prior distributions of  $\mathcal{U}(0, 1)$ . A summary of all the prior distributions described above associated with the epidemic model is given in **Table S1.3**.

|                                                                             | Parameter                                                                                              | Value                         | Source |
|-----------------------------------------------------------------------------|--------------------------------------------------------------------------------------------------------|-------------------------------|--------|
| <i>Duration of immunity</i>                                                 |                                                                                                        |                               |        |
| $1/\xi$                                                                     | Maternally-derived (days)                                                                              | $\mathcal{U}(14, 180)$        | 7–9    |
| $1/\omega$                                                                  | Post-infection (days)                                                                                  | $\mathcal{U}(60, 200)$        | 5, 6   |
| <i>Duration of symptomatic infection</i>                                    |                                                                                                        |                               |        |
| $1/\sigma$                                                                  | Exposure (days)                                                                                        | $\text{Gamma}(7.111, 0.563)$  | 10     |
| $1/\gamma_0$                                                                | Primary infection (days)                                                                               | $W(4.137, 8.303)$             | 11     |
| $g_1$                                                                       | Proportional decrease between secondary and primary infection                                          | $W(34.224, 0.879)$            | 11     |
| $g_2$                                                                       | Proportional decrease between tertiary and secondary infection                                         | $\mathcal{LN}(-0.561, 0.163)$ |        |
| <i>Susceptibility</i>                                                       |                                                                                                        |                               |        |
| $\delta_1$                                                                  | Relative susceptibility to secondary infection, relative to primary infection                          | $\mathcal{B}(35.583, 11.417)$ | 12     |
| $\delta_2$                                                                  | Relative susceptibility to tertiary infection, relative to secondary infection                         | $\mathcal{B}(22.8293, 171)$   | 12     |
| $\delta_3$                                                                  | Relative susceptibility to subsequent infections after third infection, relative to tertiary infection | $\mathcal{B}(6.117, 12.882)$  | 12     |
| <i>Asymptomatic infection</i>                                               |                                                                                                        |                               |        |
| $p^{<1}$                                                                    | Proportion asymptomatic (<1 years)                                                                     | $\mathcal{B}(3.003, 29.997)$  | 14     |
| $p^{1-4}$                                                                   | Proportion asymptomatic (1–4 years)                                                                    | $\mathcal{B}(8.996, 43.004)$  | 14     |
| $p^{5-14}$                                                                  | Proportion asymptomatic (5–14 years)                                                                   | $\mathcal{B}(38.033, 34.967)$ | 14     |
| $p^{>15}$                                                                   | Proportion asymptomatic (15+ years)                                                                    | $\mathcal{B}(35.955, 11.045)$ | 14     |
| $\alpha$                                                                    | Reduction in infectiousness                                                                            | $\mathcal{U}(0, 1)$           | —      |
| <i>Transmission parameters</i>                                              |                                                                                                        |                               |        |
| $q_p$                                                                       | Probability of transmission of RSV per physical contact.                                               | $\mathcal{U}(0, 1)$           | —      |
| $q_s$                                                                       | Reduction in transmission due to conversational contact                                                | $\mathcal{U}(0, 1)$           | —      |
| $b_1$                                                                       | Relative amplitude                                                                                     | $\mathcal{U}(0, 1)$           | —      |
| $\phi$                                                                      | Seasonal offset                                                                                        | $\mathcal{U}(0, 1)$           | —      |
| $\psi$                                                                      | Width of seasonal peak                                                                                 | $\mathcal{U}(0, 1)$           | —      |
| <i>Initial parameters (at <math>t = 0</math>, age group <math>a</math>)</i> |                                                                                                        |                               |        |
| $l_1$                                                                       | Initial proportion infected                                                                            | $\mathcal{U}(0, 1)$           | —      |
| $l_2$                                                                       | Initial proportion of non-infected individuals who are protected                                       | $\mathcal{U}(0, 1)$           | —      |

**Table S1.3:** Prior distributions of the parameters in the transmission model. Subscript  $i$  indicates exposure level and superscript  $a$  indicates age group.

## S1.3 Model-fitting

### S1.3.1 Detection model

The virological surveillance data used to calibrate the transmission model is the Respiratory DataMart System (RDMS). RDMS is a laboratory-based virological sentinel surveillance system, which systematically collects data on the number of RSV positive and negative clinical respiratory samples from 14 Public Health England (PHE) and National Health Service (NHS) laboratories in England.<sup>15</sup> From RDMS, we extracted the total number of weekly laboratory-confirmed cases of RSV from July 2010 and up until June 2017 for each age group. The number of positive samples for age group  $a$  and week number  $w_t$  is given by  $d_{w_t}^a \in \mathcal{D}$ , where  $\mathcal{D}$  is the set of all samples.

Only a small proportion of the total RSV infections will be detected by the RDMS. This is because RSV infections which are included are only those in which the infected individual:

1. acquired infection in a region which is covered by the surveillance system
2. consulted healthcare at some clinical interface
3. the health care profession offering a test
4. the test is accurate in detecting the RSV virus

As severity of RSV infection depends on age, points 2) and 3) imply that the proportion of total RSV infections which are present in the RDMS is likely to be dependent on age. Therefore, we assumed that the per-infection detection probability by the RDMS surveillance system,  $\epsilon^a$ , could be dependent on age (note that  $Z_{w_t}^a \epsilon^a \approx d_{w_t}^a$ ).

Due to lack of direct information for estimates of the detection probability, we first estimated an approximate value,  $\bar{\epsilon}^a$  by dividing the proportion of the population which are reported in the dataset  $p_+^a$  by an estimate for the attack rate in age group,  $r^a$  (**Figure S1.5**). The estimate for the attack rate is found from a prospective cohort study<sup>16</sup> for children less than 5 years, and for individuals greater than 5 years we used the attack rate from the aforementioned prospective cohort study for the first year, under the assumption all infants are fully susceptibility, and multiplied it by the prior distribution for the relative reduction in susceptibility  $\delta_i$ . The approximate values for the detection probability,  $\bar{\epsilon}^a = p_+^a / r^a$ , are plotted in **Figure S1.5**. By defining the total number of positive samples for age group  $a$  per year from RDMS as  $D^a$ , the weighted proportion of samples for each age group is given by  $w^a = D^a / \sum_a D_a$ .

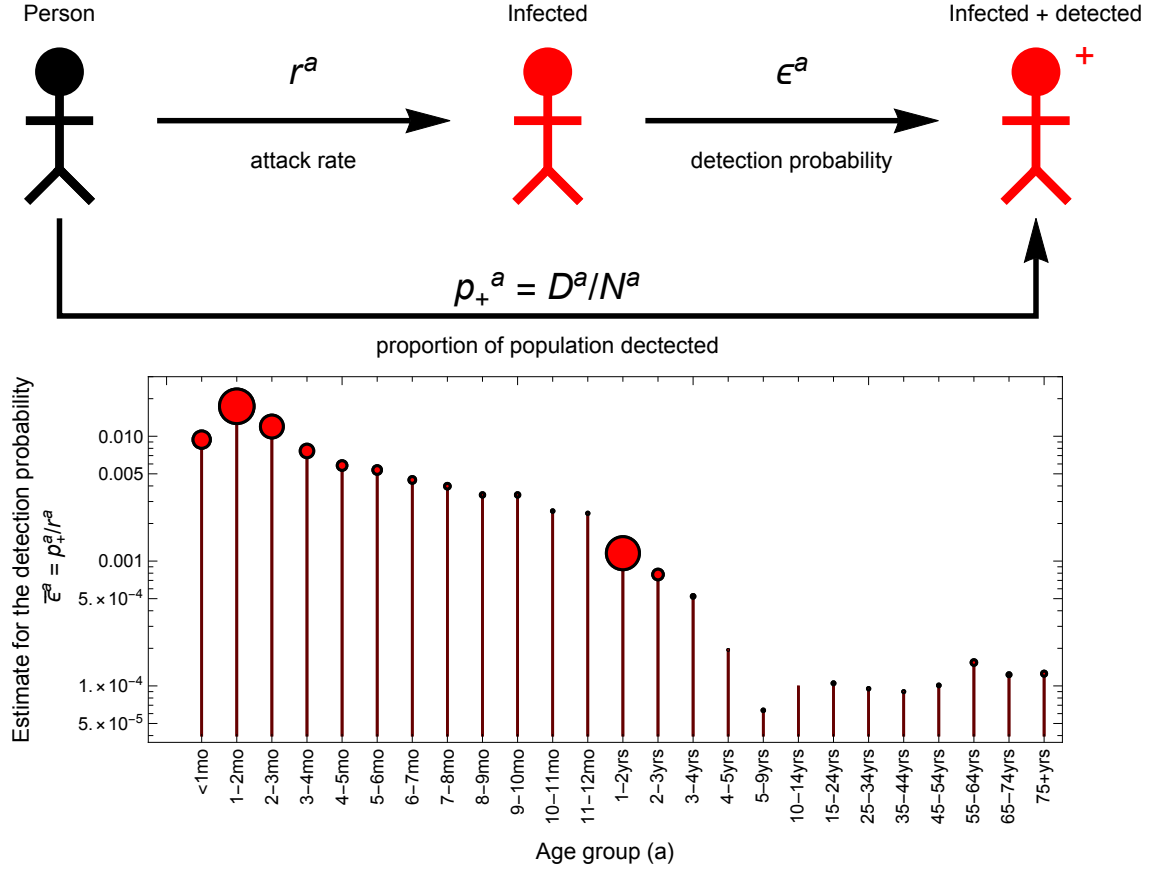

**Figure S1.5:** Top: Schematic showing the multiplicative relationship in age group  $a$  between the estimated attack rate  $r^a$ , the detection probability  $\epsilon^a$ , and the proportion of the population caught in the RDMS surveillance dataset,  $p_+^a$ . Bottom: For each age group  $a$ , this plot shows the estimated value for the detection probability  $\bar{\epsilon}^a$ , and the number of positive RSV samples from the RDMS dataset  $D^a$  which is proportional with the radius of the point marker.

Assuming that each age group has a unique detection probability could over fit the model, however, using too few detection probabilities lead to a poorly fitted model. We chose the optimal number of age dependent detection rates by performing a formal model comparison using Akaike Information Criteria (AIC) to choose between 5 models which vary in the number of detection probabilities used between ages 0-4 years. The first age structure ( $\mathcal{E}^1$ ) assumed the same detection probability value for all 0-4 year olds. The second, third and fourth structures ( $\mathcal{E}^2$ ,  $\mathcal{E}^3$  and  $\mathcal{E}^4$ ) assumed that the 0-4 age groups is parameterised by 2, 3 and 4 different detection probabilities. To find the optimal age stratification for each of these three structures, we fitted the values of  $\bar{\epsilon}^j$  to a discrete-valued function using a weighted least squares method (using the weights  $w^j$ ) for all possible stratifications of this age group and then chose the age stratification with the smallest corresponding AIC. This method gave the optimal age stratifications of  $\{0-2\text{mo}, 3\text{mo}-4\text{yrs}\}$ ,  $\{0-2\text{mo}, 3-7\text{mo}, 8\text{mo}-4\text{yrs}\}$  and  $\{0-2\text{mo}, 3-5\text{mo}, 6-11\text{mo}, 1-4\text{yrs}\}$  for the three structures respectively. For the fifth structure, we assumed that the values of detection probability are parameterised according to an exponential decay  $\exp(ax + b)$ , where  $a$  and  $b$  are parameters to be estimated.

For detection models  $\mathcal{E}^j, j = \{1, 2, 3, 4\}$ , the prior distribution for each of the detection probabilities  $\epsilon^j$ , were found by calculating the weighted mean and standard deviation of the estimated detection probabilities values  $\bar{\epsilon}^j$  contained within the age range of the stratification and then fitting these moments (through **Equation S1.7**) to a Gamma distribution. For  $\mathcal{E}^5$ , the detection probability for age group  $j$ , is given by fitting a non-linear weighted least squares with the exponential



function of the form  $\exp(ax + b)$  to the estimated detection probabilities values between 0 and 4 years. The mean and standard deviations of the parameters of the fitted exponential ( $a$  and  $b$ ) are then then assumed to follow a normal distribution. A summary of all the age stratifications and prior distributions for all five of the model structures are given in **Table S1.4**.

| Parameter                                                                                                                                                                                    | Prior distribution                        | Source             |
|----------------------------------------------------------------------------------------------------------------------------------------------------------------------------------------------|-------------------------------------------|--------------------|
| <i>Detection model structure 1, <math>\mathcal{E}^1 = \{\epsilon_{S_1}^1, \epsilon_{S_1}^2, \epsilon_{S_1}^3\}</math></i>                                                                    |                                           |                    |
| $\epsilon_{S_1}^1$ 0–4yrs                                                                                                                                                                    | Gamma(1.4278, 0.0050)                     | $\bar{\epsilon}^a$ |
| <i>Detection model structure 2, <math>\mathcal{E}^2 = \{\epsilon_{S_2}^1, \epsilon_{S_2}^2, \epsilon_{S_2}^3, \epsilon_{S_2}^4\}</math></i>                                                  |                                           |                    |
| $\epsilon_{S_2}^1$ 0–2mo                                                                                                                                                                     | Gamma(10.9978, 0.0013)                    | $\bar{\epsilon}^a$ |
| $\epsilon_{S_2}^2$ 3mo–4yrs                                                                                                                                                                  | Gamma(1.7757, 0.0018)                     | $\bar{\epsilon}^a$ |
| <i>Detection model structure 3, <math>\mathcal{E}^3 = \{\epsilon_{S_3}^1, \epsilon_{S_3}^2, \epsilon_{S_3}^3, \epsilon_{S_3}^4, \epsilon_{S_3}^5\}</math></i>                                |                                           |                    |
| $\epsilon_{S_3}^1$ 0–2mo                                                                                                                                                                     | Gamma(10.9978, 0.0013)                    | $\bar{\epsilon}^a$ |
| $\epsilon_{S_3}^2$ 3–8mo                                                                                                                                                                     | Gamma(11.9721, 0.00045)                   | $\bar{\epsilon}^a$ |
| $\epsilon_{S_3}^3$ 9mo–4yrs                                                                                                                                                                  | Gamma(2.16447, 0.00063)                   | $\bar{\epsilon}^a$ |
| <i>Detection model structure 4, <math>\mathcal{E}^4 = \{\epsilon_{S_4}^1, \epsilon_{S_4}^2, \epsilon_{S_4}^3, \epsilon_{S_4}^4, \epsilon_{S_4}^5, \epsilon_{S_4}^6\}</math></i>              |                                           |                    |
| $\epsilon_{S_4}^1$ 0–2mo                                                                                                                                                                     | Gamma(10.9978, 0.0013)                    | $\bar{\epsilon}^a$ |
| $\epsilon_{S_4}^2$ 3–6mo                                                                                                                                                                     | Gamma(27.1392, 0.00024)                   | $\bar{\epsilon}^a$ |
| $\epsilon_{S_4}^3$ 7–11mo                                                                                                                                                                    | Gamma(19.8873, 0.00018)                   | $\bar{\epsilon}^a$ |
| $\epsilon_{S_4}^4$ 1–4yrs                                                                                                                                                                    | Gamma(7.64267, 0.00012)                   | $\bar{\epsilon}^a$ |
| <i>Detection model structure 5, <math>\mathcal{E}^5 = \{\epsilon_{S_5}^1, \epsilon_{S_5}^2, \dots, \epsilon_{S_5}^{17}, \epsilon_{S_5}^{18}\}, \epsilon_{S_5}^j = \exp(a + b * j)</math></i> |                                           |                    |
| $a$ 0–4yrs                                                                                                                                                                                   | $\mathcal{N}(-3.9885, 0.1357)$            | $\bar{\epsilon}^a$ |
| $b$                                                                                                                                                                                          | $\mathcal{N}(-0.1794, 0.0413)$            | $\bar{\epsilon}^a$ |
| <i>Common to all model structures, <math> \mathcal{E}^k  = A_k</math></i>                                                                                                                    |                                           |                    |
| $\epsilon_{S_k}^{A_k-1}$ 5–54yrs                                                                                                                                                             | Gamma(35.0678, $2.61628 \times 10^{-6}$ ) | $\bar{\epsilon}^a$ |
| $\epsilon_{S_k}^{A_k}$ 55+ yrs                                                                                                                                                               | Gamma(59.2461, $2.28079 \times 10^{-6}$ ) | $\bar{\epsilon}^a$ |

**Table S1.4:** Prior distributions for the parameters in the five detection models.

### S1.3.2 Calibration

We performed inference on the parameter set:

$$\theta^{m,e} = \mathcal{M}^m \cup \mathcal{E}^e$$

where  $m \in \{1, 2\}$  and  $e \in \{1, 2, 3, 4, 5\}$  are the possible maternal protection and detection model structures. For each model structure, the transmission model estimated the number of new infections per week  $Z_{w_t}^a$  and the detection model estimated the age-dependent probability of being reported in the RDMS dataset,  $\epsilon^a$ . We assume that year-to-year changes in the number of RSV positive samples are due to i) changes in sampling protocol, ii) hospital admission thresholds being lowered (particularly in the younger infants) and/or iii) failure to manage these acute illnesses in the community care setting.<sup>17</sup> Therefore, to account for these year-to-year changes we normalise the number of RSV positive samples in age group  $a$  during year  $y$  relative to year 7 (2016–17) so that each year has the same total number of positive samples in age group  $a$ . Mathematically, for the number of positive samples  $d_{w_t}^a$  for age group  $a$  during week number  $w_t$ , we define

$$D_y^a = \sum_{t=1+52 \times 6(y-1)}^{52+52 \times 6(y-1)} d_{w_t}^a \quad (\text{S1.9})$$

Then, the normalised data  $\bar{d}_{w_t}^a$  during year  $y$ , is given by

$$\bar{d}_{w_t}^a = \frac{d_{w_t}^a D_7^a}{D_y^a} \quad (\text{S1.10})$$

By treating each infection in age group  $a$  as a Bernoulli trial, which has probability of success (being detected in the normalised RDMS dataset  $\mathcal{D}$ ) of  $\epsilon^a$ , the likelihood function for the parameter set  $(\theta^{m,c})$  for week,  $w_t$  and age group  $a$  is given by the binomial distribution  $\bar{d}_{w_t}^a \sim \text{Bin}(Z_{w_t}^{\mathcal{M}^m, a}, \epsilon^a)$ . Fitting the output for each age group over to seven years of weekly incidence data, the full likelihood is the product of each age and weekly binomial likelihood function:

$$\mathcal{L}(\mathcal{D}|\theta^{m,c}) = \mathcal{L}(\mathcal{D}|\mathcal{M}^m, \mathcal{E}^c) = \prod_{a=1}^{25} \prod_{t=1}^{7*52} \text{Bin}(Z_{w_t}^{\mathcal{M}^m, a}, \epsilon^a)$$

Using this likelihood and the prior distributions, the posterior distributions for the parameters in the model are determined using an adaptive parallel tempering Metropolis Hastings algorithm with a temperature ladder consisting of 12 chains and an adaptive covariance matrix.<sup>18</sup> The proposal distribution was a multivariate truncated normal distribution ( $\mathcal{TN}$ ), with the boundaries of the distributions equal to the support for each parameter. Thus, for each of the 12 chains, given a Markov chain of length,  $i$ ,  $\{\theta_i\}_{t=0}^i$  the equation of the acceptance probability of a new position,  $\theta' \sim \mathcal{TN}(\theta_i, \Sigma_i)$  is

$$a(\theta_i, \theta') = \frac{\mathcal{L}(\mathcal{D}|\theta')p(\theta')}{\mathcal{L}(\mathcal{D}|\theta_i)p(\theta_i)} \frac{\mathcal{TN}(\theta_i|\theta', \Sigma_i)}{\mathcal{TN}(\theta'|\theta_i, \Sigma_i)} \quad (\text{S1.11})$$

### S1.3.3 Model choice

To determine which of the model structures (maternal protection model  $m$  and detection model  $e$ ) best estimates the incidence of RSV given the RDMS data, we calculated a Deviance Information Criterion (DIC) given by

$$\text{DIC}^{m,c} = -2(\overline{\mathcal{L}(\mathcal{D}|\theta^{m,c})} - \mathcal{L}(\mathcal{D}|\bar{\theta}^{m,c})) \quad (\text{S1.12})$$

where  $\mathcal{L}(\mathcal{D}|\bar{\theta})$  is the likelihood of the mean of the posterior samples and  $\overline{\mathcal{L}(\mathcal{D}|\theta)}$  is the mean of the likelihood of the posteriors samples.

### S1.3.4 Posterior distributions

Each of the 12 Markov chains ran for 50,000 steps, where the first 25,000 steps were the burn-in and the final 25,000 steps were the empirical samples for the posterior distributions for each of the parameters. The final posterior samples were thinned every 20 steps, given a empirical sample of 1,250 values for the joint posterior distribution.

### S1.3.5 Implementation

The transmission model ODEs were solved using the Euler method in Ascent package in C++, using a time step of 1 day over a 8 year period, (1 year to reach a steady state and 7 years to calculate the likelihood).

The binomial likelihood function leads to computationally unmanageable values, therefore we consider the log likelihood. The equation for the log likelihood function is therefore:

$$\log \mathcal{L}(\mathcal{D}|\theta) \approx \begin{cases} \sum_{a=1}^{25} \sum_{t=1}^{52 \times 7} -Z_{w_t}^a \epsilon^a, & \text{when } \bar{d}_t^a = 0 \\ \sum_{a=1}^{25} \sum_{t=1}^{52 \times 7} \bar{d}_t^a \log(Z_{w_t}^a \epsilon^j) - n Z_{w_t}^{a,\theta} \epsilon^j - \sum_{k=1}^{\bar{d}_t^a} \log(k), & \text{when } \bar{d}_t^a > 0 \end{cases} \quad (\text{S1.13})$$

and the acceptance probability can be calculated:

$$a(\theta_i, \theta') = \exp(\log \mathcal{L}(\mathcal{D}|\theta') + \log(p(\theta')) - \log \mathcal{L}(\mathcal{D}|\theta_i) - \log(p(\theta_i)) + \overbrace{\log(\mathcal{TN}(\theta_i|\theta', \Sigma_i) - \mathcal{TN}(\theta'|\theta_i, \Sigma_i))}^{\text{Correction constant}})$$

(S1.14)

Evaluating the correction constant is computationally difficult as it involves evaluating two points from multivariate truncated normal distributions in a high number of dimensions. Therefore, to evaluate a this term, we used an expected propagation method outlined in Cunningham et al.<sup>19</sup>

## S1.4 Intervention model

### S1.4.1 Palivizumab programme

In order to evaluate the impact of the Palivizumab programme we stratified the infants according to whether they are Palivizumab eligible (VHR) or not (indicated by the superscript  $r$ ). To estimate the proportion of infants who are eligible for Palivizumab in age group  $a$  ( $p^{a,VHR}$ ), we first estimated the number of infants who receive Palivizumab per season in England from the number of Palivizumab units sold.<sup>20</sup> Then, we determined the age distribution using estimates for of infants who are prematurely born with Chronic Lung Disease (CLD) and Chronic Heart Disease (CHD) by gestational age in the UK<sup>21,22</sup> and the eligibility criteria for Palivizumab in UK.<sup>23</sup> This gives an estimate for the proportion of Palivizumab eligible persons of 0.00348, 0.00227 for infants aged  $< 1$  and 1 month of age, 0.00066 for infants aged 2-5 months, 0.00002 for infants aged 5-8 months and zero otherwise. The Palivizumab programme is given to all very-high-risk neonates between October and February and assumes a 90% coverage (2,128 courses).

The ODEs of the Palivizumab programme for age group  $a$  and clinical-risk group  $r$  are:

$$\begin{aligned}
M^{a,r} &= \overbrace{p_R \mu p^{a,r} \mathbb{1}_1(a) (1 - \phi_{P,pal}^{a,r}) - \xi M^{a,r}}^{\text{Transmission terms}} && \overbrace{-\eta^a M^{a,r} + \eta^{a-1} M^{a-1} p^{a,r} (1 - \phi_{P,pal}^{a,r})}^{\text{Ageing terms}} && \overbrace{+ V_P^{\dot{a},r} \omega_{pal}}^{\text{Palivizumab terms}} \\
S_0^{\dot{a},r} &= (1 - p_R) \mu p^{a,r} \mathbb{1}_1(a) (1 - \phi_{P,pal}^{a,r}) + \xi M^{a,s} - \lambda_0^{a,r}(t) S_0^{a,r} && -\eta^a S_0^{a,r} + \eta^{a-1} S_0^{a-1} p^{a,r} (1 - \phi_{P,pal}^{a,r}) && \\
E_0^{\dot{a},r} &= \lambda_0^{a,r}(t) S_0^{a,s} - \sigma E_0^{a,r} && -\eta^a E_0^{a,r} + \eta^{a-1} E_0^{a-1} p^{a,r} (1 - \phi_{P,pal}^{a,r}) && \\
A_0^{\dot{a},r} &= p^a \sigma E_0^{a,r} - \gamma_0 A_0^{a,r} \rho && -\eta^a A_0^{a,r} + \eta^{a-1} A_0^{a-1} p^{a,r} (1 - \phi_{P,pal}^{a,r}) && \\
I_0^{\dot{a},r} &= (1 - p^a) \sigma E_0^{a,r} - \gamma_0 I_0^{a,r} && -\eta^a I_0^{a,r} + \eta^{a-1} I_0^{a-1} p^{a,r} (1 - \phi_{P,pal}^{a,r}) && \\
R_0^{\dot{a},r} &= \rho \gamma_0 A_0^{a,r} + \gamma_0 I_0^{a,r} - \omega R_0^{a,r} && -\eta^a R_0^{a,r} + \eta^{a-1} R_0^{a-1} p^{a,r} (1 - \phi_{P,pal}^{a,r}) && \\
S_1^{\dot{a},r} &= \omega R_0^{a,r} - \lambda_1^{a,r}(t) S_1^{a,r} && -\eta^a S_1^{a,r} + \eta^{a-1} S_1^{a-1} p^{a,r} (1 - \phi_{P,pal}^{a,r}) && \\
E_1^{\dot{a},r} &= \lambda_1^{a,r}(t) S_1^{a,r} - \sigma E_1^{a,r} && -\eta^a E_1^{a,r} + \eta^{a-1} E_1^{a-1} p^{a,r} (1 - \phi_{P,pal}^{a,r}) && \\
A_1^{\dot{a},r} &= p^a \sigma E_1^{a,r} - \gamma_1 A_1^{a,r} \rho && -\eta^a A_1^{a,r} + \eta^{a-1} A_1^{a-1} p^{a,r} (1 - \phi_{P,pal}^{a,r}) && \\
I_1^{\dot{a},r} &= (1 - p^a) \sigma E_1^{a,r} - \gamma_1 I_1^{a,r} && -\eta^a I_1^{a,r} + \eta^{a-1} A_1^{a-1} p^{a,r} (1 - \phi_{P,pal}^{a,r}) && \\
R_1^{\dot{a},r} &= \rho \gamma_1 A_1^{a,r} + \gamma_1 I_1^{a,r} - \omega R_1^{a,r} && -\eta^a R_1^{a,r} + \eta^{a-1} R_1^{a-1} p^{a,r} (1 - \phi_{P,pal}^{a,r}) && \\
S_2^{\dot{a},r} &= \omega R_1^{a,r} - \lambda_2^{a,r}(t) S_2^{a,r} && -\eta^a S_2^{a,r} + \eta^{a-1} S_2^{a-1} p^{a,r} (1 - \phi_{P,pal}^{a,r}) && \\
E_2^{\dot{a},r} &= \lambda_2^{a,r}(t) S_2^{a,r} - \sigma E_2^{a,r} && -\eta^a E_2^{a,r} + \eta^{a-1} E_2^{a-1} p^{a,r} (1 - \phi_{P,pal}^{a,r}) && \\
A_2^{\dot{a},r} &= p^a \sigma E_2^{a,r} - \gamma_2 A_2^{a,r} \rho && -\eta^a A_2^{a,r} + \eta^{a-1} A_2^{a-1} p^{a,r} (1 - \phi_{P,pal}^{a,r}) && \\
I_2^{\dot{a},r} &= (1 - p^a) \sigma E_2^{a,r} - \gamma_2 I_2^{a,r} && -\eta^a I_2^{a,r} + \eta^{a-1} I_2^{a-1} p^{a,r} (1 - \phi_{P,pal}^{a,r}) && \\
R_2^{\dot{a},r} &= \rho \gamma_2 A_2^{a,r} + \gamma_2 I_2^{a,r} - \omega R_2^{a,r} && -\eta^a R_2^{a,r} + \eta^{a-1} R_2^{a-1} p^{a,r} (1 - \phi_{P,pal}^{a,r}) && \\
S_3^{\dot{a},r} &= \omega R_2^{a,r} + \omega R_3^{a,r} - \lambda_3^{a,r}(t) S_2^{a,r} && -\eta^a S_3^{a,r} + \eta^{a-1} S_3^{a-1} p^{a,r} (1 - \phi_{P,pal}^{a,r}) && \\
E_3^{\dot{a},r} &= \lambda_3^{a,r}(t) S_2^{a,r} - \sigma E_3^{a,r} && -\eta^a E_3^{a,r} + \eta^{a-1} E_3^{a-1} p^{a,r} (1 - \phi_{P,pal}^{a,r}) && \\
A_3^{\dot{a},r} &= p^a \sigma E_3^{a,r} - \gamma_3 A_3^{a,r} \rho && -\eta^a A_3^{a,r} + \eta^{a-1} A_3^{a-1} p^{a,r} (1 - \phi_{P,pal}^{a,r}) && \\
I_3^{\dot{a},r} &= (1 - p^a) \sigma E_3^{a,r} - \gamma_3 I_3^{a,r} && -\eta^a I_3^{a,r} + \eta^{a-1} I_3^{a-1} p^{a,r} (1 - \phi_{P,pal}^{a,r}) && \\
R_3^{\dot{a},r} &= \rho \gamma_3 A_3^{a,r} + \gamma_3 I_3^{a,r} - \omega R_3^{a,r} && -\eta^a R_3^{a,r} + \eta^{a-1} R_3^{a-1} p^{a,r} (1 - \phi_{P,pal}^{a,r}) && \\
V_P^{\dot{a},r} &= \mu p^{a,r} \mathbb{1}_1(a) \phi_{P,pal}^{a,r} + (N^{a,r} - V_P^{a,r}) \phi_{P,pal}^{a,r} && -\eta^a V_P^{a,r} + \eta^{a-1} V_P^{a-1} p^{a,r} && -V_P^{\dot{a},r} \omega_{pal} \\
Z^{\dot{a},r} &= \sigma (E_0^{a,r} + E_1^{a,r} + E_2^{a,r} + E_3^{a,r}) && && 
\end{aligned} \tag{S1.15}$$

where an overdot refers to differentiation with respect to  $t$ ,  $\mathbb{1}_1(a)$  is the indicator function (non-zero at  $a = 1$ ), and the equation for the force of infection is:

$$\lambda_i^{a,r}(t) = q_p f_i(t) \sum_{b=1}^{25} \frac{(p^{a,b} + q_c \mathbf{1}^{a,b})}{N^b} \left( \sum_{r,i} A_i^{b,r} \alpha + I_i^{b,r} \right)$$

where  $\sum_{r,i}$  is the sum over all the Palivizumab eligible and non-Palivizumab eligible clinical-risk groups, and exposure groups  $i = \{0, 1, 2, 3\}$  and  $f_i(t) = q_p (1 + b_1 \exp((t - \phi)^2 / (2\psi^2))) \prod_{i'=0}^i \delta_{i'}$ . Further,  $\phi_{P,pal}^{a,r}$  is the number of persons who are protected by Palivizumab in age group  $a$  and clinical-risk group  $r$ . The

initial conditions for this set of ODEs are given by **Equations S1.3** with  $N = N^{a,r}$  and  $V_P^{a,r} = 0$ .

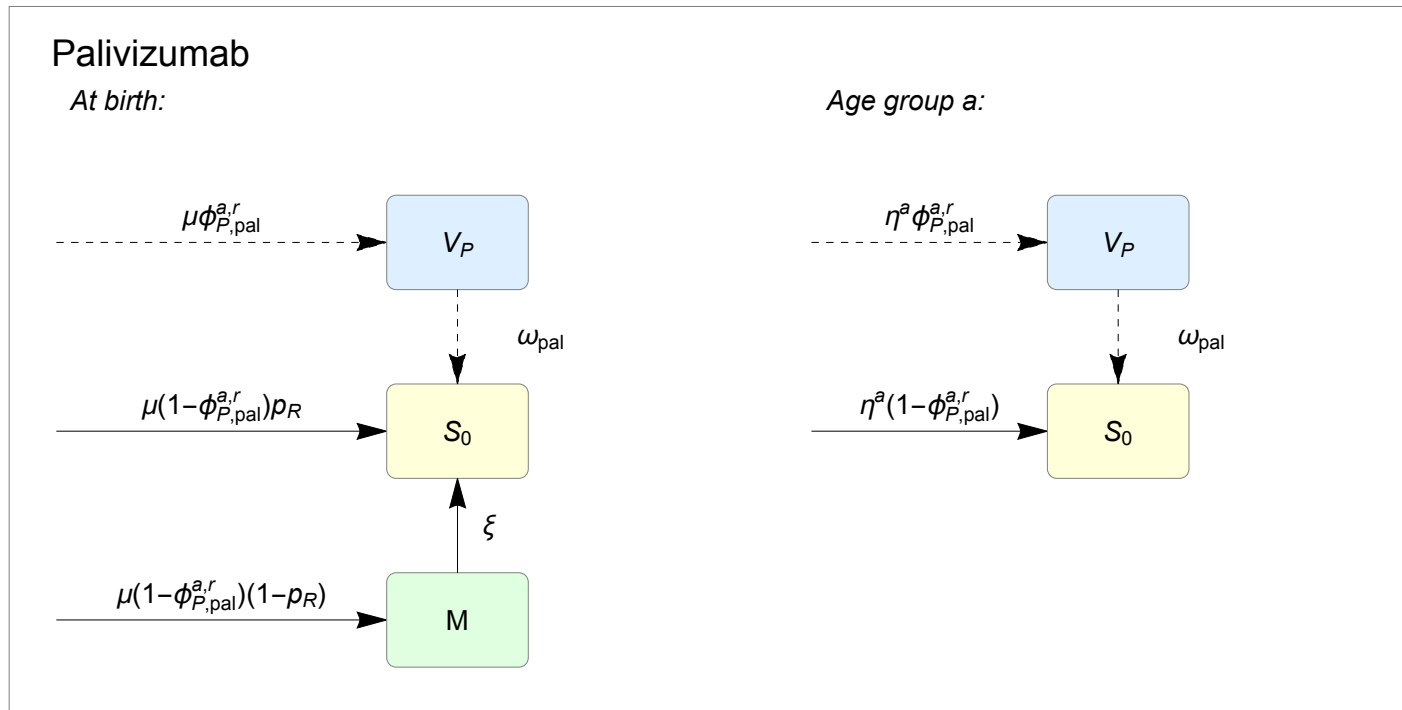

**Figure S1.6:** The relationship between the state variables ( $V_P$ : protected due to Palivizumab antibodies) used in the Palivizumab intervention model. For Palivizumab the parameters are  $\mu$ , the birth rate,  $p_R$  the proportion of infants born with protection due to maternal immunity, and  $\phi_{P,pal}^{a,r}$  the proportion of infants in age group  $a$ , clinical risk group  $r$  who are newly protected by Palivizumab at time  $t$ . The left schematic shows the rate of change between epidemiological groups when Palivizumab is administered at birth. The right schematic shows the rate of change between epidemiological groups when Palivizumab is given other age group. The rate of loss of immunity is given by  $\omega_{pal}$  and shown by a dashed line. Rate of loss of maternal protection occurs at rate  $\xi$  and is shown by a solid line.

### S1.4.2 Long-acting monoclonal antibodies programmes

In order to evaluate the impact of intervention programmes aimed at infants in different clinical risk groups, we stratified the infants into demographic groups according to their clinical-risk status i) Palivizumab-eligible (VHR), ii) high-risk (HR), and neither (NR) (indicated by the superscript  $r$ ). To estimate the proportion of infants who are high-risk, we assume the prevalence is 3.8% across each monthly age group up to 11 months.<sup>24</sup>

The monoclonal antibody programmes considered are given below:

| Intervention programme name | Prophylactic(s) | Eligible population  | Window of administration | Coverage of eligible population | Annual number of courses | Comparator  |
|-----------------------------|-----------------|----------------------|--------------------------|---------------------------------|--------------------------|-------------|
| MAB-VHR                     | La-mAB          | VHR infants          | October-February         | 90%                             | 11,679                   | Palivizumab |
| MAB-HR-S                    | La-mAB          | VHR infants          | October-February         | 90%                             |                          | MAB-VHR     |
|                             | La-mAB          | HR neonates          | October-February         | 90%                             |                          |             |
| MAB-HR-S+                   | La-mAB          | VHR infants          | October-February         | 90%                             | 22,907                   | MAB-VHR     |
|                             | La-mAB          | HR neonates          | October-February         | 90%                             |                          |             |
|                             | La-mAB          | HR 1-5 months        | September-October        | 90%                             |                          |             |
| MAB-ALL-S                   | La-mAB          | VHR infants          | October-February         | 90%                             | 252,581                  | MAB-HR-S+   |
|                             | La-mAB          | HR and HR neonates   | October-February         | 90%                             |                          |             |
| MAB-ALL-S+                  | La-mAB          | VHR infants          | October-February         | 90%                             | 547,818                  | MAB-ALL-S   |
|                             | La-mAB          | HR and HR neonates   | October-February         | 90%                             |                          |             |
|                             | La-mAB          | HR and HR 1-5 months | September-October        | 90%                             |                          |             |

**Table S1.5:** Summary of the characteristics of the intervention programmes which use long-acting monoclonal antibodies. La-mAB: Long-acting monoclonal antibodies

The ODEs of the RSV intervention model for the long-acting monoclonal antibodies programmes, for age group  $a$  and clinical-risk group  $r$  are:

$$\begin{aligned}
 \dot{M}^{a,r} &= \overbrace{p_R \mu p^{a,r} \mathbb{1}_1(a) (1 - \phi_{P,mab}^{a,r}) - \xi M^{a,r}}^{\text{Transmission terms}} - \overbrace{\eta^a M^{a,r} + \eta^{a-1} M^{a-1} p^{a,r} (1 - \phi_{P,mab}^{a,r})}^{\text{Ageing terms}} \\
 \dot{S}_0^{a,r} &= (1 - p_R) \mu p^{a,r} \mathbb{1}_1(a) (1 - \phi_{P,mab}^{a,r}) + \xi M^{a,s} - \lambda_0^{a,r}(t) S_0^{a,r} - \eta^a S_0^{a,r} + \eta^{a-1} S_0^{a-1} p^{a,r} (1 - \phi_{P,mab}^{a,r}) \\
 \dot{E}_0^{a,r} &= \lambda_0^{a,r}(t) S_0^{a,s} - \sigma E_0^{a,r} - \eta^a E_0^{a,r} + \eta^{a-1} E_0^{a-1} p^{a,r} (1 - \phi_{P,mab}^{a,r}) \\
 \dot{A}_0^{a,r} &= p^a \sigma E_0^{a,r} - \gamma_0 A_0^{a,r} \rho - \eta^a A_0^{a,r} + \eta^{a-1} A_0^{a-1} p^{a,r} (1 - \phi_{P,mab}^{a,r}) \\
 \dot{I}_0^{a,r} &= (1 - p^a) \sigma E_0^{a,r} - \gamma_0 I_0^{a,r} - \eta^a I_0^{a,r} + \eta^{a-1} I_0^{a-1} p^{a,r} (1 - \phi_{P,mab}^{a,r}) \\
 \dot{R}_0^{a,r} &= \rho \gamma_0 A_0^{a,r} + \gamma_0 I_0^{a,r} - \omega R_0^{a,r} - \eta^a R_0^{a,r} + \eta^{a-1} R_0^{a-1} p^{a,r} (1 - \phi_{P,mab}^{a,r}) \\
 \dot{S}_1^{a,r} &= \omega R_0^{a,r} - \lambda_1^{a,r}(t) S_1^{a,r} - \eta^a S_1^{a,r} + \eta^{a-1} S_1^{a-1} p^{a,r} (1 - \phi_{P,mab}^{a,r}) \\
 \dot{E}_1^{a,r} &= \lambda_1^{a,r}(t) S_1^{a,r} - \sigma E_1^{a,r} - \eta^a E_1^{a,r} + \eta^{a-1} E_1^{a-1} p^{a,r} (1 - \phi_{P,mab}^{a,r}) \\
 \dot{A}_1^{a,r} &= p^a \sigma E_1^{a,r} - \gamma_1 A_1^{a,r} \rho - \eta^a A_1^{a,r} + \eta^{a-1} A_1^{a-1} p^{a,r} (1 - \phi_{P,mab}^{a,r}) \\
 \dot{I}_1^{a,r} &= (1 - p^a) \sigma E_1^{a,r} - \gamma_1 I_1^{a,r} - \eta^a I_1^{a,r} + \eta^{a-1} A_1^{a-1} p^{a,r} (1 - \phi_{P,mab}^{a,r}) \\
 \dot{R}_1^{a,r} &= \rho \gamma_1 A_1^{a,r} + \gamma_1 I_1^{a,r} - \omega R_1^{a,r} - \eta^a R_1^{a,r} + \eta^{a-1} R_1^{a-1} p^{a,r} (1 - \phi_{P,mab}^{a,r}) \\
 \dot{S}_2^{a,r} &= \omega R_1^{a,r} - \lambda_2^{a,r}(t) S_2^{a,r} - \eta^a S_2^{a,r} + \eta^{a-1} S_2^{a-1} p^{a,r} (1 - \phi_{P,mab}^{a,r}) \\
 \dot{E}_2^{a,r} &= \lambda_2^{a,r}(t) S_2^{a,r} - \sigma E_2^{a,r} - \eta^a E_2^{a,r} + \eta^{a-1} E_2^{a-1} p^{a,r} (1 - \phi_{P,mab}^{a,r}) \\
 \dot{A}_2^{a,r} &= p^a \sigma E_2^{a,r} - \gamma_2 A_2^{a,r} \rho - \eta^a A_2^{a,r} + \eta^{a-1} A_2^{a-1} p^{a,r} (1 - \phi_{P,mab}^{a,r}) \\
 \dot{I}_2^{a,r} &= (1 - p^a) \sigma E_2^{a,r} - \gamma_2 I_2^{a,r} - \eta^a I_2^{a,r} + \eta^{a-1} I_2^{a-1} p^{a,r} (1 - \phi_{P,mab}^{a,r}) \\
 \dot{R}_2^{a,r} &= \rho \gamma_2 A_2^{a,r} + \gamma_2 I_2^{a,r} - \omega R_2^{a,r} - \eta^a R_2^{a,r} + \eta^{a-1} R_2^{a-1} p^{a,r} (1 - \phi_{P,mab}^{a,r}) \\
 \dot{S}_3^{a,r} &= \omega R_2^{a,r} + \omega R_3^{a,r} - \lambda_3^{a,r}(t) S_2^{a,r} - \eta^a S_3^{a,r} + \eta^{a-1} S_3^{a-1} p^{a,r} (1 - \phi_{P,mab}^{a,r}) \\
 \dot{E}_3^{a,r} &= \lambda_3^{a,r}(t) S_2^{a,r} - \sigma E_3^{a,r} - \eta^a E_3^{a,r} + \eta^{a-1} E_3^{a-1} p^{a,r} (1 - \phi_{P,mab}^{a,r}) \\
 \dot{A}_3^{a,r} &= p^a \sigma E_3^{a,r} - \gamma_3 A_3^{a,r} \rho - \eta^a A_3^{a,r} + \eta^{a-1} A_3^{a-1} p^{a,r} (1 - \phi_{P,mab}^{a,r}) \\
 \dot{I}_3^{a,r} &= (1 - p^a) \sigma E_3^{a,r} - \gamma_3 I_3^{a,r} - \eta^a I_3^{a,r} + \eta^{a-1} I_3^{a-1} p^{a,r} (1 - \phi_{P,mab}^{a,r}) \\
 \dot{R}_3^{a,r} &= \rho \gamma_3 A_3^{a,r} + \gamma_3 I_3^{a,r} - \omega R_3^{a,r} - \eta^a R_3^{a,r} + \eta^{a-1} R_3^{a-1} p^{a,r} (1 - \phi_{P,mab}^{a,r}) \\
 \dot{V}_M^{a,r} &= \mu p^{a,r} \mathbb{1}_1(a) \phi_{P,mab}^{a,r} + (N^{a,r} - V_P^{a,r}) \phi_{P,mab}^{a,r} - \eta^a V_M^{a,r} + \eta^{a-1} V_M^{a-1} p^{a,r} \\
 \dot{Z}^{a,r} &= \sigma (E_0^{a,r} + E_1^{a,r} + E_2^{a,r} + E_3^{a,r}) - V_M^{a,r} \omega_{mab}
 \end{aligned} \tag{S1.16}$$

where an overdot refers to differentiation with respect to  $t$ ,  $\mathbb{1}_1(a)$  is the indicator function (non-zero at  $a = 1$ ), and the equations for the force of infection is:

$$\lambda_i^{a,r}(t) = q_p f_i(t) \sum_{b=1}^{25} \frac{(p^{a,b} + q_c \mathbf{c}^{a,b})}{N^b} \left( \sum_{r,i} A_i^{b,r} \alpha + I_i^{b,r} \right)$$

where  $\sum_{r,i}$  is the sum over all risk groups  $\mathcal{R} = \{NR, HR, VHR\}$  and exposure groups  $i = \{0, 1, 2, 3\}$  and  $f_i(t) = q_p (1 + b_1 \exp((t - \phi)^2 / (2\psi^2))) \prod_{i'=0}^i \delta_{i'}$ . Further,  $\phi_{P,mab}^{a,r}$  is the number of persons who are protected by monoclonal antibodies in age group  $a$  and clinical risk group  $r$ ,



The initial conditions for this set of ODEs are given by **Equations (S1.3)** with  $N = N^{a,r}$  and  $V_M^{a,r} = 0$ .

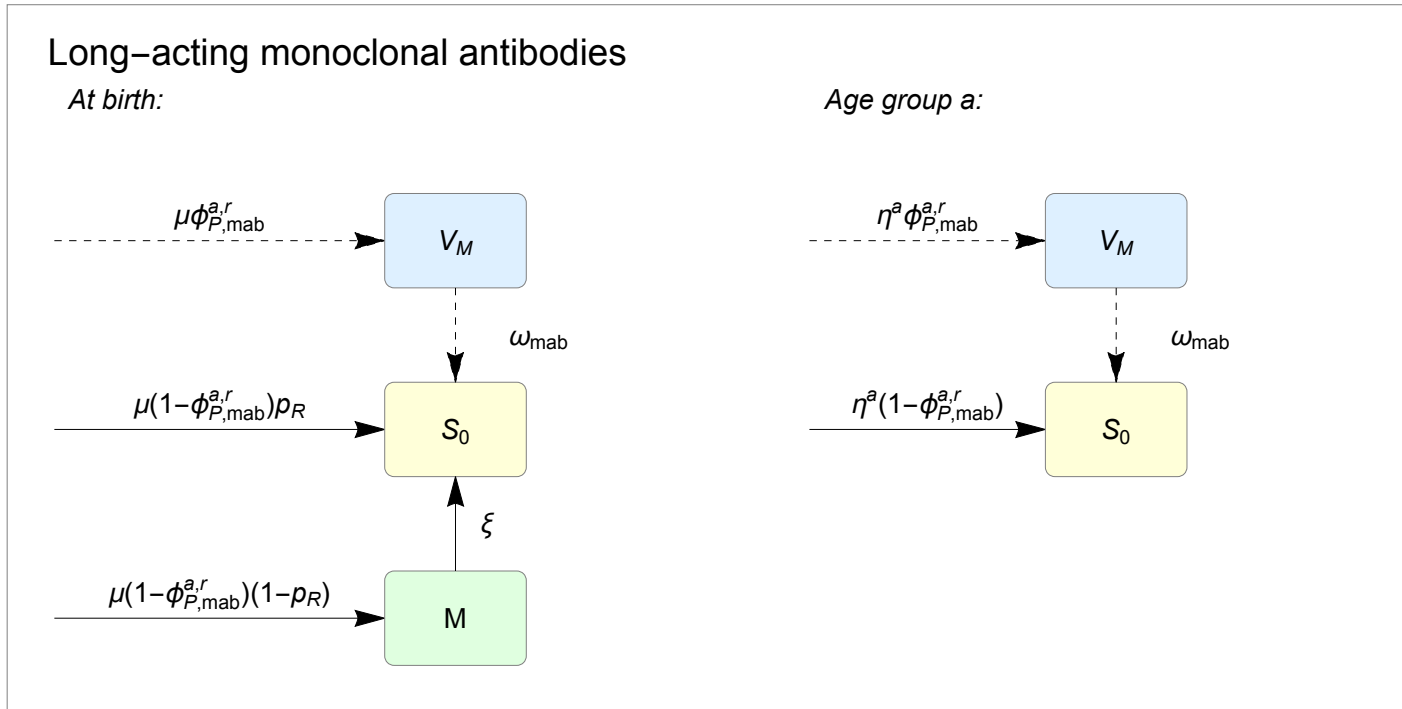

**Figure S1.7:** The relationship between the state variables ( $V_M$ : protected due to long-acting monoclonal antibodies) used in the long-acting monoclonal antibodies intervention model. For long-acting monoclonal antibodies the parameters are  $\mu$ , the birth rate,  $p_R$  the proportion of infants born with protection due to maternal immunity, and  $\phi_{P,mab}^{a,r}$  the proportion of infants in age group  $a$ , clinical risk group  $r$  who are newly protected by long-acting monoclonal antibodies at time  $t$ . The left schematic shows the rate of change between epidemiological groups when monoclonal antibodies are administered at birth. The right schematic shows the rate of change between epidemiological groups when long-acting monoclonal antibodies are given other age group. The rate of loss of immunity is given by  $\omega_{mab}$  and shown by the dashed line. Rate of loss of maternal protection occurs at rate  $\xi$  and is shown by a solid line.

### S1.4.3 Childhood/elderly vaccination programmes

The childhood and elderly intervention programmes considered are given below:

| Intervention programme name | Prophylactic(s) | Eligible population | Window of administration | Coverage of eligible population | Annual number of courses | Comparator  |
|-----------------------------|-----------------|---------------------|--------------------------|---------------------------------|--------------------------|-------------|
| VAC-INF-S                   | Palivizumab     | VHR infants         | October-February         | 90%                             | 2,128                    | Palivizumab |
|                             | Vaccine         | 2-month-olds        | September-January        | 90%                             | 251,162                  |             |
| VAC-INF-A                   | Palivizumab     | VHR infants         | October-February         | 90%                             | 2,128                    | VAC-INF-S   |
|                             | Vaccine         | 2-month-olds        | Year-round               | 90%                             | 617,724                  |             |
| VAC-2-4                     | Palivizumab     | VHR infants         | October-February         | 90%                             | 2,128                    | VAC-INF-A   |
|                             | Vaccine         | 2-4 year olds       | October-February         | 45%                             | 917,008                  |             |
| VAC-5-9                     | Palivizumab     | VHR infants         | October-February         | 90%                             | 2,128                    | VAC-2-4     |
|                             | Vaccine         | 5-9 year olds       | October-February         | 60%                             | 2,046,820                |             |
| VAC-5-14                    | Palivizumab     | VHR infants         | October-February         | 90%                             | 2,128                    | VAC-5-9     |
|                             | Vaccine         | 5-14 year olds      | August-December          | 60%                             | 4,093,640                |             |
| VAC-75+                     | Palivizumab     | VHR infants         | October-February         | 90%                             | 2,128                    | VAC-5-14    |
|                             | Vaccine         | 75+ year olds       | November-March           | 70%                             | 5,495,680                |             |
| VAC-65+                     | Palivizumab     | VHR infants         | October-February         | 90%                             | 2,128                    | VAC-75+     |
|                             | Vaccine         | 65+ year olds       | November-March           | 70%                             | 10,281,800               |             |

**Table S1.6:** Summary of the characteristics of the intervention programmes which use vaccines

The ODEs of the RSV intervention model for the above childhood and elderly programmes, for age group  $a$  and clinical-risk group  $r$  are:

$$\begin{aligned}
M^{\dot{a},r} &= \overbrace{p_R \mu p^{a,r} \mathbb{1}_1(a) (1 - \phi_{P,pal}^{a,r}) - \xi M^{a,r}}^{\text{Transmission terms}} \quad \overbrace{-\eta^a M^{a,r} + \eta^{a-1} M^{a-1} p^{a,r} (1 - \phi_{P,pal}^{a,r})}^{\text{Ageing terms}} \quad \overbrace{+V_P^{\dot{a},r} \omega_{pal}}^{\text{Palivizumab terms}} \quad \overbrace{-\bar{S}_0^{a,r} \phi_{P,vac}^{a,r}}^{\text{Vaccination terms}} \\
S_0^{\dot{a},r} &= (1 - p_R) \mu p^{a,r} \mathbb{1}_1(a) (1 - \phi_{P,pal}^{a,r}) + \xi M^{a,s} - \lambda_0^{a,r}(t) S_0^{a,r} \quad -\eta^a S_0^{a,r} + \eta^{a-1} S_0^{a-1} p^{a,r} (1 - \phi_{P,pal}^{a,r}) \\
E_0^{\dot{a},r} &= \lambda_0^{a,r}(t) S_0^{a,s} - \sigma E_0^{a,r} \quad -\eta^a E_0^{a,r} + \eta^{a-1} E_0^{a-1} p^{a,r} (1 - \phi_{P,pal}^{a,r}) \\
A_0^{\dot{a},r} &= p^a \sigma E_0^{a,r} - \gamma_0 A_0^{a,r} \rho \quad -\eta^a A_0^{a,r} + \eta^{a-1} A_0^{a-1} p^{a,r} (1 - \phi_{P,pal}^{a,r}) \\
I_0^{\dot{a},r} &= (1 - p^a) \sigma E_0^{a,r} - \gamma_0 I_0^{a,r} \quad -\eta^a I_0^{a,r} + \eta^{a-1} I_0^{a-1} p^{a,r} (1 - \phi_{P,pal}^{a,r}) \\
R_0^{\dot{a},r} &= \rho \gamma_0 A_0^{a,r} + \gamma_0 I_0^{a,r} - \omega R_0^{a,r} \quad -\eta^a R_0^{a,r} + \eta^{a-1} R_0^{a-1} p^{a,r} (1 - \phi_{P,pal}^{a,r}) \\
S_1^{\dot{a},r} &= \omega R_0^{a,r} - \lambda_1^{a,r}(t) S_1^{a,r} \quad -\eta^a S_1^{a,r} + \eta^{a-1} S_1^{a-1} p^{a,r} (1 - \phi_{P,pal}^{a,r}) \\
E_1^{\dot{a},r} &= \lambda_1^{a,r}(t) S_1^{a,r} - \sigma E_1^{a,r} \quad -\eta^a E_1^{a,r} + \eta^{a-1} E_1^{a-1} p^{a,r} (1 - \phi_{P,pal}^{a,r}) \\
A_1^{\dot{a},r} &= p^a \sigma E_1^{a,r} - \gamma_1 A_1^{a,r} \rho \quad -\eta^a A_1^{a,r} + \eta^{a-1} A_1^{a-1} p^{a,r} (1 - \phi_{P,pal}^{a,r}) \\
I_1^{\dot{a},r} &= (1 - p^a) \sigma E_1^{a,r} - \gamma_1 I_1^{a,r} \quad -\eta^a I_1^{a,r} + \eta^{a-1} A_1^{a-1} p^{a,r} (1 - \phi_{P,pal}^{a,r}) \\
R_1^{\dot{a},r} &= \rho \gamma_1 A_1^{a,r} + \gamma_1 I_1^{a,r} - \omega R_1^{a,r} \quad -\eta^a R_1^{a,r} + \eta^{a-1} R_1^{a-1} p^{a,r} (1 - \phi_{P,pal}^{a,r}) \\
S_2^{\dot{a},r} &= \omega R_1^{a,r} - \lambda_2^{a,r}(t) S_2^{a,r} \quad -\eta^a S_2^{a,r} + \eta^{a-1} S_2^{a-1} p^{a,r} (1 - \phi_{P,pal}^{a,r}) \\
E_2^{\dot{a},r} &= \lambda_2^{a,r}(t) S_2^{a,r} - \sigma E_2^{a,r} \quad -\eta^a E_2^{a,r} + \eta^{a-1} E_2^{a-1} p^{a,r} (1 - \phi_{P,pal}^{a,r}) \\
A_2^{\dot{a},r} &= p^a \sigma E_2^{a,r} - \gamma_2 A_2^{a,r} \rho \quad -\eta^a A_2^{a,r} + \eta^{a-1} A_2^{a-1} p^{a,r} (1 - \phi_{P,pal}^{a,r}) \\
I_2^{\dot{a},r} &= (1 - p^a) \sigma E_2^{a,r} - \gamma_2 I_2^{a,r} \quad -\eta^a I_2^{a,r} + \eta^{a-1} I_2^{a-1} p^{a,r} (1 - \phi_{P,pal}^{a,r}) \\
R_2^{\dot{a},r} &= \rho \gamma_2 A_2^{a,r} + \gamma_2 I_2^{a,r} - \omega R_2^{a,r} \quad -\eta^a R_2^{a,r} + \eta^{a-1} R_2^{a-1} p^{a,r} (1 - \phi_{P,pal}^{a,r}) \\
S_3^{\dot{a},r} &= \omega R_2^{a,r} + \omega R_3^{a,r} - \lambda_3^{a,r}(t) S_2^{a,r} \quad -\eta^a S_3^{a,r} + \eta^{a-1} S_3^{a-1} p^{a,r} (1 - \phi_{P,pal}^{a,r}) \\
E_3^{\dot{a},r} &= \lambda_3^{a,r}(t) S_2^{a,r} - \sigma E_3^{a,r} \quad -\eta^a E_3^{a,r} + \eta^{a-1} E_3^{a-1} p^{a,r} (1 - \phi_{P,pal}^{a,r}) \\
A_3^{\dot{a},r} &= p^a \sigma E_3^{a,r} - \gamma_3 A_3^{a,r} \rho \quad -\eta^a A_3^{a,r} + \eta^{a-1} A_3^{a-1} p^{a,r} (1 - \phi_{P,pal}^{a,r}) \\
I_3^{\dot{a},r} &= (1 - p^a) \sigma E_3^{a,r} - \gamma_3 I_3^{a,r} \quad -\eta^a I_3^{a,r} + \eta^{a-1} I_3^{a-1} p^{a,r} (1 - \phi_{P,pal}^{a,r}) \\
R_3^{\dot{a},r} &= \rho \gamma_3 A_3^{a,r} + \gamma_3 I_3^{a,r} - \omega R_3^{a,r} \quad -\eta^a R_3^{a,r} + \eta^{a-1} R_3^{a-1} p^{a,r} (1 - \phi_{P,pal}^{a,r}) \\
V_P^{\dot{a},r} &= \mu p^{a,r} \mathbb{1}_1(a) \phi_{P,pal}^{a,r} + (N^{a,r} - V_P^{a,r}) \phi_{P,pal}^{a,r} \quad -\eta^a V_P^{a,r} + \eta^{a-1} V_P^{a-1} p^{a,r} \\
Z^{\dot{a},r} &= \sigma (E_0^{a,r} + E_1^{a,r} + E_2^{a,r} + E_3^{a,r}) \quad -V_P^{\dot{a},r} \omega_{pal}
\end{aligned} \tag{S1.17}$$

where an overdot refers to differentiation with respect to  $t$ ,  $\mathbb{1}_1(a)$  is the indicator function (non-zero at  $a = 1$ ), and the equation for the force of infection is:

$$\lambda_i^{a,r}(t) = q_p f_i(t) \sum_{b=1}^{25} \frac{(p^{a,b} + q_c \mathbf{1}^{a,b})}{N^b} \left( \sum_{r,i} A_i^{b,r} \alpha + I_i^{b,r} \right)$$

where  $\sum_{r,i}$  is the sum over all risk groups  $\mathcal{R} = \{NR, HR, VHR\}$  and exposure groups  $i = \{0, 1, 2, 3\}$  and  $f_i(t) = q_p (1 + b_1 \exp((t - \phi)^2 / (2\psi^2))) \prod_{i'=0}^i \delta_{i'}$ . Further,  $\phi_{P,pal}^{a,r}$  is the number of persons who are protected by Palivizumab in age group  $a$  and clinical risk group  $r$ , and  $\phi_{P,vac}^{a,r}$  is the number of persons protected

by vaccination in age group  $a$  and clinical risk group  $a$  at time  $t$ .

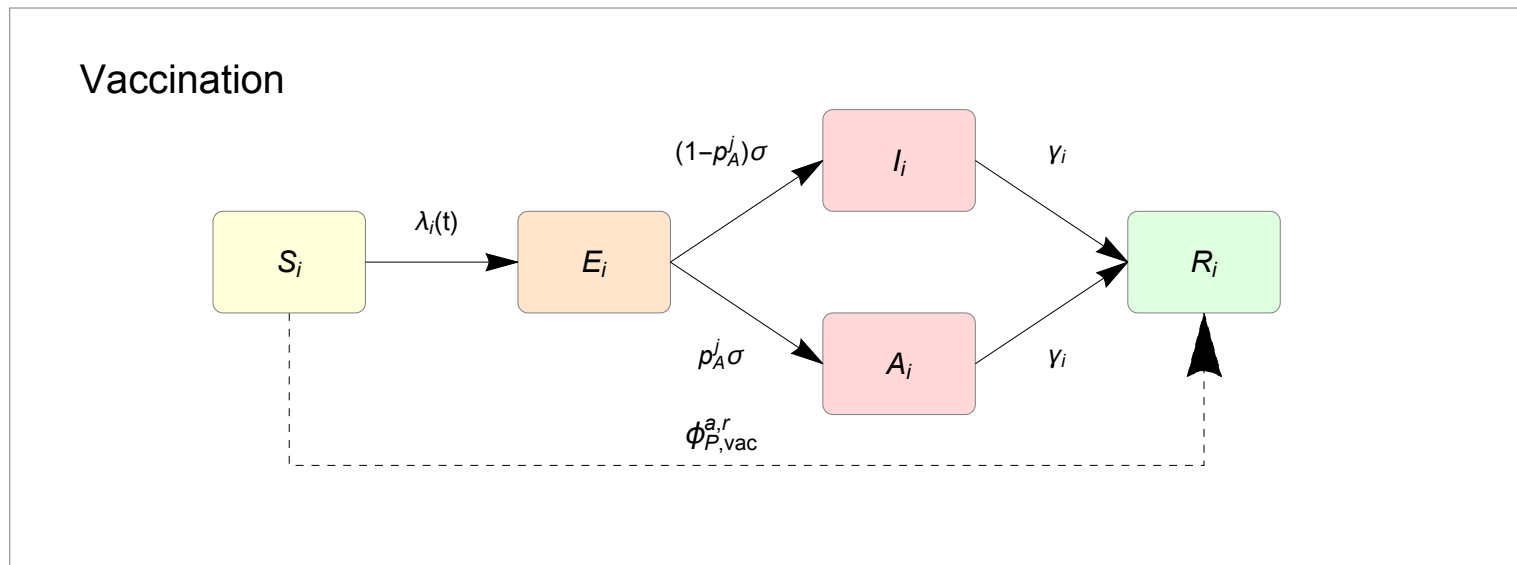

**Figure S1.8:** The relationship between state variables for vaccination in children or the elderly. Here  $\phi_{P,vac}^{a,r}$  is the proportion of individuals in age group  $a$ , clinical risk group  $r$  who are newly protected by vaccination at time  $t$ . Solid lines refer to natural disease progression and dashed lines refer to immune progression due to vaccination.

The initial conditions for this set of ODEs are given by **Equations (S1.3)** with  $N = N^{a,r}$  and  $V_P^{a,r} = 0$ .

### S1.4.4 Maternal vaccine programmes

The proportion of persons in age group  $a$  who are mothers with an infant less than 1 years of age,  $u^a$ , was calculated by multiplying the total number of infants less than 1 by the age-specific proportion of births by parental age  $u_p^a$  ( $u_p^a$  is non-zero for  $a = 19, 20$  and  $21$  only).<sup>25</sup> This gives proportions of 0.0175, 0.0601, and 0.0233 for 15–24, 25–34, and 35–44 years respectively.<sup>25</sup> The proportion of mothers who are in the programme is given by  $\phi_c = 0.6$ . We define,  $u^{a,p} = u^a(1 - \phi_c)$ ,  $u^{a,c} = u^a\phi_c$  and  $u^{a,n} = (1 - u^a)$ .

When evaluating the maternal vaccination programmes, the age and clinical-risk groups are further stratified according to maternal status and whether they are including in the programme (see **Table S1.7**). The strategy is the same as outlined in a previous mathematical model which evaluates the impact the maternal Pertussis vaccines.<sup>26</sup>

| Superscript | Description                                                                                                                                                                |
|-------------|----------------------------------------------------------------------------------------------------------------------------------------------------------------------------|
| $n$         | Infants less than 1 years of age and who are not participating in the maternal vaccination programmes and adults who are not mothers who have given birth in the last year |
| $p$         | Mothers who have given birth in the last year who are not in the maternal vaccine programme                                                                                |
| $c$         | Mothers who have given birth in the last year and are in the maternal vaccine programme and the newly born infant.                                                         |

**Table S1.7:** Summary of the maternal vaccine-related states.

The maternal vaccine programmes considered are given below:

| Intervention programme name | Prophylactic(s)  | Eligible population                        | Window of administration | Coverage of eligible population | Annual number of courses | Comparator  |
|-----------------------------|------------------|--------------------------------------------|--------------------------|---------------------------------|--------------------------|-------------|
| MAT-S                       | Palivizumab      | VHR infants                                | August-December          | 90%                             | 2,128                    | Palivizumab |
|                             | Maternal vaccine | Pregnant women 28-32 weeks gestational age | October-February         | 60%                             | 165,257                  |             |
| MAT-A                       | Palivizumab      | VHR infants                                | October-February         | 90%                             | 2,128                    | MAT-S       |
|                             | Maternal vaccine | Pregnant women 28-32 weeks gestational age | Year-round               | 60%                             | 406,442                  |             |

**Table S1.8:** Summary of the characteristics of the intervention programmes which use maternal-vaccines

$$\begin{aligned}
M^{a,r,s} &= \overbrace{p_R \mu p^{a,r,s} u^{a,s} \mathbb{1}_1(a) (1 - \phi_{P,pal}^{a,r,s}) (1 - \phi_{P,mat}^{a,r,s}) + \phi_{P,mat}^{a,r,s} \mu p^{a,r,s} u^{a,s} \mathbb{1}_1(a) - \xi M^{a,r,s}}^{\text{Transmission terms}} \overbrace{-\eta^a M^{a,r,s} + \eta^{a-1} M^{a-1} p^{a,r,s} u^a \phi_c (1 - \phi_{P,pal}^{a,r,s})}^{\text{Ageing terms}} \\
S_0^{a,r,s} &= (1 - p_R) \mu p^{a,r,s} u^{a,s} \mathbb{1}_1(a) (1 - \phi_{P,pal}^{a,r,s}) + \xi M^{a,r,s} - \lambda_0^{a,r,s} (t) S_0^{a,r,s} & -\eta^a S_0^{a,r,s} + \eta^{a-1} S_0^{a-1} p^{a,r,s} u^{a,s} (1 - \phi_{P,pal}^{a,r,s}) \\
E_0^{a,r,s} &= \lambda_0^{a,r,s} (t) S_0^{a,r,s} - \sigma E_0^{a,r,s} & -\eta^a E_0^{a,r,s} + \eta^{a-1} E_0^{a-1} p^{a,r,s} u^{a,s} (1 - \phi_{P,pal}^{a,r,s}) \\
A_0^{a,r,s} &= p^a \sigma E_0^{a,r,s} - \gamma_0 A_0^{a,r,s} \rho & -\eta^a A_0^{a,r,s} + \eta^{a-1} A_0^{a-1} p^{a,r,s} u^{a,s} (1 - \phi_{P,pal}^{a,r,s}) \\
I_0^{a,r,s} &= (1 - p^a) \sigma E_0^{a,r,s} - \gamma_0 I_0^{a,r,s} & -\eta^a I_0^{a,r,s} + \eta^{a-1} I_0^{a-1} p^{a,r,s} u^{a,s} (1 - \phi_{P,pal}^{a,r,s}) \\
R_0^{a,r,s} &= \rho \gamma_0 A_0^{a,r,s} + \gamma_0 I_0^{a,r,s} - \omega R_0^{a,r,s} & -\eta^a R_0^{a,r,s} + \eta^{a-1} R_0^{a-1} p^{a,r,s} u^{a,s} (1 - \phi_{P,pal}^{a,r,s}) \\
S_1^{a,r,s} &= \omega R_0^{a,r,s} - \lambda_1^{a,r,s} (t) S_1^{a,r,s} & -\eta^a S_1^{a,r,s} + \eta^{a-1} S_1^{a-1} p^{a,r,s} u^{a,s} (1 - \phi_{P,pal}^{a,r,s}) \\
E_1^{a,r,s} &= \lambda_1^{a,r,s} (t) S_1^{a,r,s} - \sigma E_1^{a,r,s} & -\eta^a E_1^{a,r,s} + \eta^{a-1} E_1^{a-1} p^{a,r,s} u^{a,s} (1 - \phi_{P,pal}^{a,r,s}) \\
A_1^{a,r,s} &= p^a \sigma E_1^{a,r,s} - \gamma_1 A_1^{a,r,s} \rho & -\eta^a A_1^{a,r,s} + \eta^{a-1} A_1^{a-1} p^{a,r,s} u^{a,s} (1 - \phi_{P,pal}^{a,r,s}) \\
I_1^{a,r,s} &= (1 - p^a) \sigma E_1^{a,r,s} - \gamma_1 I_1^{a,r,s} & -\eta^a I_1^{a,r,s} + \eta^{a-1} A_1^{a-1} p^{a,r,s} u^{a,s} (1 - \phi_{P,pal}^{a,r,s}) \\
R_1^{a,r,s} &= \rho \gamma_1 A_1^{a,r,s} + \gamma_1 I_1^{a,r,s} - \omega R_1^{a,r,s} & -\eta^a R_1^{a,r,s} + \eta^{a-1} R_1^{a-1} p^{a,r,s} u^{a,s} (1 - \phi_{P,pal}^{a,r,s}) \\
S_2^{a,r,s} &= \omega R_1^{a,r,s} - \lambda_2^{a,r,s} (t) S_2^{a,r,s} & -\eta^a S_2^{a,r,s} + \eta^{a-1} S_2^{a-1} p^{a,r,s} u^{a,s} (1 - \phi_{P,pal}^{a,r,s}) \\
E_2^{a,r,s} &= \lambda_2^{a,r,s} (t) S_2^{a,r,s} - \sigma E_2^{a,r,s} & -\eta^a E_2^{a,r,s} + \eta^{a-1} E_2^{a-1} p^{a,r,s} u^{a,s} (1 - \phi_{P,pal}^{a,r,s}) \\
A_2^{a,r,s} &= p^a \sigma E_2^{a,r,s} - \gamma_2 A_2^{a,r,s} \rho & -\eta^a A_2^{a,r,s} + \eta^{a-1} A_2^{a-1} p^{a,r,s} u^{a,s} (1 - \phi_{P,pal}^{a,r,s}) \\
I_2^{a,r,s} &= (1 - p^a) \sigma E_2^{a,r,s} - \gamma_2 I_2^{a,r,s} & -\eta^a I_2^{a,r,s} + \eta^{a-1} I_2^{a-1} p^{a,r,s} u^{a,s} (1 - \phi_{P,pal}^{a,r,s}) \\
R_2^{a,r,s} &= \rho \gamma_2 A_2^{a,r,s} + \gamma_2 I_2^{a,r,s} - \omega R_2^{a,r,s} & -\eta^a R_2^{a,r,s} + \eta^{a-1} R_2^{a-1} p^{a,r,s} u^{a,s} (1 - \phi_{P,pal}^{a,r,s}) \\
S_3^{a,r,s} &= \omega R_2^{a,r,s} + \omega R_3^{a,r,s} - \lambda_3^{a,r,s} (t) S_3^{a,r,s} & -\eta^a S_3^{a,r,s} + \eta^{a-1} S_3^{a-1} p^{a,r,s} u^{a,s} (1 - \phi_{P,pal}^{a,r,s}) \\
E_3^{a,r,s} &= \lambda_3^{a,r,s} (t) S_3^{a,r,s} - \sigma E_3^{a,r,s} & -\eta^a E_3^{a,r,s} + \eta^{a-1} E_3^{a-1} p^{a,r,s} u^{a,s} (1 - \phi_{P,pal}^{a,r,s}) \\
A_3^{a,r,s} &= p^a \sigma E_3^{a,r,s} - \gamma_3 A_3^{a,r,s} \rho & -\eta^a A_3^{a,r,s} + \eta^{a-1} A_3^{a-1} p^{a,r,s} u^{a,s} (1 - \phi_{P,pal}^{a,r,s}) \\
I_3^{a,r,s} &= (1 - p^a) \sigma E_3^{a,r,s} - \gamma_3 I_3^{a,r,s} & -\eta^a I_3^{a,r,s} + \eta^{a-1} I_3^{a-1} p^{a,r,s} u^{a,s} (1 - \phi_{P,pal}^{a,r,s}) \\
R_3^{a,r,s} &= \rho \gamma_3 A_3^{a,r,s} + \gamma_3 I_3^{a,r,s} - \omega R_3^{a,r,s} & -\eta^a R_3^{a,r,s} + \eta^{a-1} R_3^{a-1} p^{a,r,s} u^{a,s} (1 - \phi_{P,pal}^{a,r,s}) \\
V_P^{a,r,s} &= \mu p^{a,r,s} u^{a,s} \mathbb{1}_1(a) \phi_{P,pal}^{a,r,s} + (N^{a,r,s} - V_P^{a,r,s}) \phi_{P,pal}^{a,r,s} & -\eta^a V_P^{a,r,s} + \eta^{a-1} V_P^{a-1} p^{a,r,s} u^{a,s} \\
Z^{a,r,s} &= \sigma (E_0^{a,r,s} + E_1^{a,r,s} + E_2^{a,r,s} + E_3^{a,r,s}) & -V_P^{a,r,s} \omega_{pal}
\end{aligned}$$

(S1.18)

where the force of infection is given by defining  $\mathcal{I}^{b,s} = \sum_{i,r} A_i^{b,r,s} \alpha + I_i^{b,r,s}$  for maternal vaccine groups,  $s = \{n, p, c\}$ , then the equations for the force of infection for the three maternal vaccine states are:

$$\lambda_i^{a,r,n}(t) = q_p f_i(t) \sum_{b=1}^{25} \left[ \frac{(p^{a(n),b(n)} + q_c \mathbf{c}^{a(n),b(n)})}{N^{b,n}} \mathcal{I}^{b,n} + \frac{p^{a(n),b(p)} + q_c \mathbf{c}^{a(n),b(p)}}{N^{b,p}} \mathcal{I}^{b,p} + \frac{p^{a(n),b(c)} + q_c \mathbf{c}^{a(n),b(c)}}{N^{b,c}} \mathcal{I}^{b,c} \right] \quad (S1.19)$$

$$\lambda_i^{a,r,p}(t) = q_p f_i(t) \sum_{b=1}^{25} \left[ \frac{(\mathbf{p}^{a(p),b(n)} + q_c \mathbf{c}^{a(p),b(n)})}{N^{b,n}} \mathcal{I}^{b,n} + \frac{\mathbf{p}^{a(p),b(p)} + q_c \mathbf{c}^{a(p),b(p)}}{N^{b,p}} \mathcal{I}^{b,p} + \frac{\mathbf{p}^{a(p),b(c)} + q_c \mathbf{c}^{a(p),b(c)}}{N^{b,c}} \mathcal{I}^{b,c} \right] \quad (\text{S1.20})$$

$$\lambda_i^{a,r,c}(t) = q_p f_i(t) \sum_{b=1}^{25} \left[ \frac{(\mathbf{p}^{a(c),b(n)} + q_c \mathbf{c}^{a(c),b(n)})}{N^{b,n}} \mathcal{I}^{b,n} + \frac{\mathbf{p}^{a(c),b(p)} + q_c \mathbf{c}^{a(c),b(p)}}{N^{b,p}} \mathcal{I}^{b,p} + \frac{\mathbf{p}^{a(c),b(c)} + q_c \mathbf{c}^{a(c),b(c)}}{N^{b,c}} \mathcal{I}^{b,c} \right] \quad (\text{S1.21})$$

where the contact matrices are defined in **Table S1.9**. These contact matrices are modified versions of the matrices outlined in the mathematical model used to evaluate the impact of maternal Pertussis vaccines.<sup>26</sup>

| Participant         |                                  | Contact, Age group (a), Maternal-vaccine group ( $s_2$ ) |                                                                      |                                                                                   |                                                                                   |                                                                                         |                    |
|---------------------|----------------------------------|----------------------------------------------------------|----------------------------------------------------------------------|-----------------------------------------------------------------------------------|-----------------------------------------------------------------------------------|-----------------------------------------------------------------------------------------|--------------------|
|                     |                                  | <1yrs                                                    |                                                                      | 15–44yrs                                                                          |                                                                                   |                                                                                         | 1-14,45+           |
| Age group (a) (yrs) | Maternal-vaccine group ( $s_1$ ) | n                                                        | c                                                                    | n                                                                                 | c                                                                                 | p                                                                                       | n                  |
| <1                  | n                                | $\mathbf{p}^{a,b}(1 - \phi_c)$                           | $\mathbf{p}^{a,b}\phi_c$                                             | $\frac{\mathbf{p}_H^{a,b}}{2} + (\mathbf{p}^{a,b} - \mathbf{p}_H^{a,b})(1 - u^b)$ | $(\mathbf{p}^{a,b} - \mathbf{p}_H^{a,b})u^b\phi_c$                                | $\frac{\mathbf{p}_H^{a,b}}{2} + (\mathbf{p}^{a,b} - \mathbf{p}_H^{a,b})u^b(1 - \phi_c)$ | $\mathbf{p}^{a,b}$ |
|                     | c                                | $\mathbf{p}^{a,b}(1 - \phi_c)$                           | $\mathbf{p}^{a,b}\phi_c$                                             | $\frac{\mathbf{p}_H^{a,b}}{2} + (\mathbf{p}^{a,b} - \mathbf{p}_H^{a,b})(1 - u^b)$ | $\frac{\mathbf{p}_H^{a,b}}{2} + (\mathbf{p}^{a,b} - \mathbf{p}_H^{a,b})u^b\phi_c$ | $(\mathbf{p}^{a,b} - \mathbf{p}_H^{a,b})u^b(1 - \phi_c)$                                | $\mathbf{p}^{a,b}$ |
| 15–44               | n                                | $\mathbf{p}^{a,b}(1 - \phi_c)$                           | $\mathbf{p}^{a,b}\phi_c$                                             | $\mathbf{p}^{a,b}(1 - u^b)$                                                       | $\mathbf{p}^{a,b}u^b\phi_c$                                                       | $\mathbf{p}^{a,b}u^b(1 - \phi_c)$                                                       | $\mathbf{p}^{a,b}$ |
|                     | c                                | $(\mathbf{p}^{a,b} - \mathbf{p}_H^{a,b})(1 - \phi_c)$    | $\mathbf{p}_H^{a,b} + (\mathbf{p}^{a,b} - \mathbf{p}_H^{a,b})\phi_c$ | $\mathbf{p}^{a,b}(1 - u^b)$                                                       | $\mathbf{p}^{a,b}u^b\phi_c$                                                       | $\mathbf{p}^{a,b}u^b(1 - \phi_c)$                                                       | $\mathbf{p}^{a,b}$ |
|                     | p                                | $(\mathbf{p}^{a,b} - \mathbf{p}_H^{a,b})(1 - \phi_c)$    | $\mathbf{p}_H^{a,b} + (\mathbf{p}^{a,b} - \mathbf{p}_H^{a,b})\phi_c$ | $\mathbf{p}^{a,b}(1 - u^b)$                                                       | $\mathbf{p}^{a,b}u^b\phi_c$                                                       | $\mathbf{p}^{a,b}u^b(1 - \phi_c)$                                                       | $\mathbf{p}^{a,b}$ |
| 1–14, 45+           | n                                | $\mathbf{p}^{a,b}(1 - \phi_c)$                           | $\mathbf{p}^{a,b}\phi_c$                                             | $\mathbf{p}^{a,b}(1 - u^b)$                                                       | $\mathbf{p}^{a,b}u^b\phi_c$                                                       | $\mathbf{p}^{a,b}u^b(1 - \phi_c)$                                                       | $\mathbf{p}^{a,b}$ |

**Table S1.9:** Formulae for synthesizing the contact matrices with maternal-vaccine stratification.

| Symbol              | Definition                                                                                                                                                                             | Source                         |
|---------------------|----------------------------------------------------------------------------------------------------------------------------------------------------------------------------------------|--------------------------------|
| $p_H^{a,b}$         | Number of daily household physical contacts only made by age group $a$ with age group $b$                                                                                              | 3, 4                           |
| $p^{a(s_1),b(s_2)}$ | Total number of daily household physical contacts made by age group $a$ and maternal vaccine group $s_1$ with age group $b$ and maternal vaccine group $s_2$ . ( $s_i = \{n, p, c\}$ ) | Generated by <b>Table S1.9</b> |
| $c_H^{a,b}$         | Number of daily household conversational contacts only made by age group $a$ with age group $b$                                                                                        | 3, 4                           |
| $c^{a(s_1),b(s_2)}$ | Total number of daily conversational contacts made by age group $a$ and maternal vaccine group $s_1$ with age group $b$ and maternal vaccine group $s_2$ . ( $s_i = \{n, p, c\}$ )     | Generated by <b>Table S1.9</b> |

Further,  $\phi_{P,pal}^{a,r}$  is the number of persons who are protected by monoclonal antibodies in age group  $a$  and clinical risk group  $r$  and  $\phi_{P,vac}^{a,r}$  is the number of persons protected by vaccination in age group  $a$  and clinical risk group  $a$  at time  $t$ .



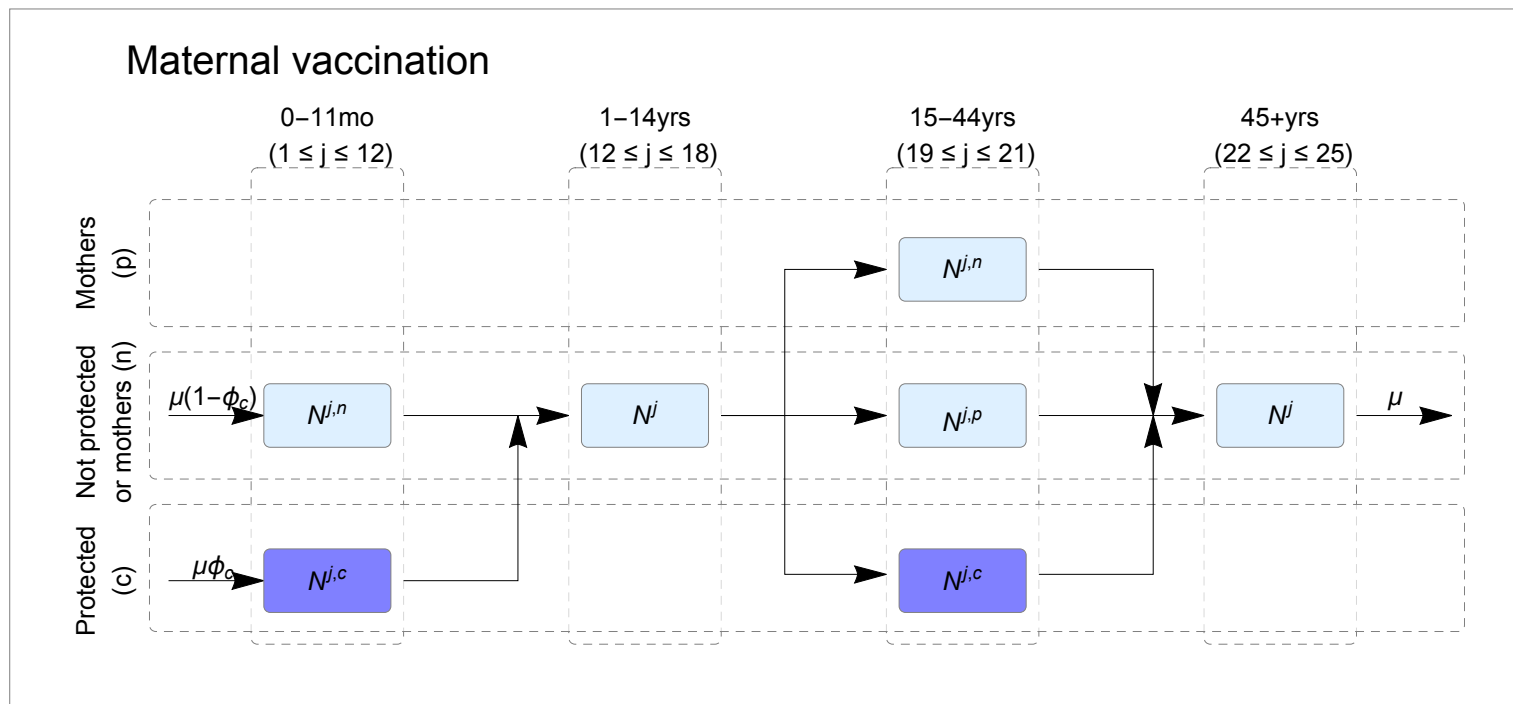

**Figure S1.9:** The relationship between maternal vaccine groups in the maternal vaccine intervention model. The parameters are the birth rate,  $\mu$ , and the proportion of women who are newly mothers included in the programme  $\phi_c$ . The model ensures that all infants born to vaccinated women are protected (all into group  $M$ ), otherwise they are born according to the dynamic maternal immunity assumption.

The initial conditions for this set of ODEs are given by **Equations (S1.3)** with  $N = N^{a,r,s}$  and  $V_P^{a,r,s} = 0$ .

## S1.5 Economic model

All of the parameters of the economic model are given in **Table 3** of the main text.

### S1.5.1 Estimating annual incidence of outcomes

We estimated the annual incidence of four different RSV-related outcomes (GP consultations, hospital bed days, symptomatic infections, hospitalisations and deaths) under the existing Palivizumab programme by synthesising recent incidence estimates for RSV outcomes in England. The incidence of GP consultations and deaths are age-dependent and estimated from three sources for each age category: 0–5 years of age,<sup>27</sup> 5–55 years<sup>28</sup> and for 55 years and over.<sup>29</sup> For hospital admissions and number of bed days, the incidence was dependent on age and clinical risk status. Reeves et al.<sup>30</sup> gives the estimated number of hospital bed days and hospital admissions for high-risk (HR) and not-at-risk (NR) infants up to 11 months of age. For the individuals aged 1–4 years and 5–14 years (which are NR), the number of hospital admissions is estimated from Reeves et al. 2017,<sup>17</sup> and Taylor et al.<sup>29</sup> and the number of bed days per hospitalisation is 2 days.<sup>31</sup> For persons aged 15–64 years and 65+ years, we used Fleming et al.<sup>28</sup> and data from PHE and assuming the average number of bed days per hospitalisations is 3 days.<sup>33</sup> For all the studies highlighted above, the mean  $\mu$  and 95% CI ( $c_l, c_u$ ) are given, therefore, we fit a probability distribution using **Fitting procedure 2**:

**Fitting procedure 2** *If CI are symmetric:* ( $|c_u - \mu| = |c_l - \mu|$ ): The fitted distribution is  $\mathcal{N}(\mu, (c_u - \mu)/2)$ . *If CI are non-symmetric:* ( $|c_u - \mu| \neq |c_l - \mu|$ ): By choosing the parametric distributions,  $\mathcal{X} = \{\text{Gamma}(\alpha, \mu/\alpha), \mathcal{LN}(\log(u), \sigma), \text{Weibull}(a, \mu(\Gamma(1 + 1/a))^{-1})\}$ , (chosen such that  $\forall X \in \mathcal{X}, \mathbb{E}[X] = \mu$ ), the fitted parameters are found by solving the non-linear equation  $\forall \theta \in \Theta = \{\alpha, \mu, a\}$

$$\int_{c_l}^{c_u} p_{\theta}(x) dx - 0.95 = 0 \quad (\text{S1.22})$$

to find the fitted values  $\tilde{\Theta}$ . We choose the uncertainty according to the distribution whose fitted parameter,  $\tilde{\theta}$  minimising the cost function

$$\lambda(\tilde{\theta}) = (P_{\tilde{\theta}}(c_l) - 0.025)^2 + (P_{\tilde{\theta}}(c_u) - 0.975)^2 \quad (\text{S1.23})$$

A summary of age-specific annual incidence rates for GP consultations, hospital admissions, number of bed days and deaths is given in **Figure S1.10**. **Fitting procedure 2** is also used to estimate all the probability distributions in **Tables 2 and 3** of the main text.

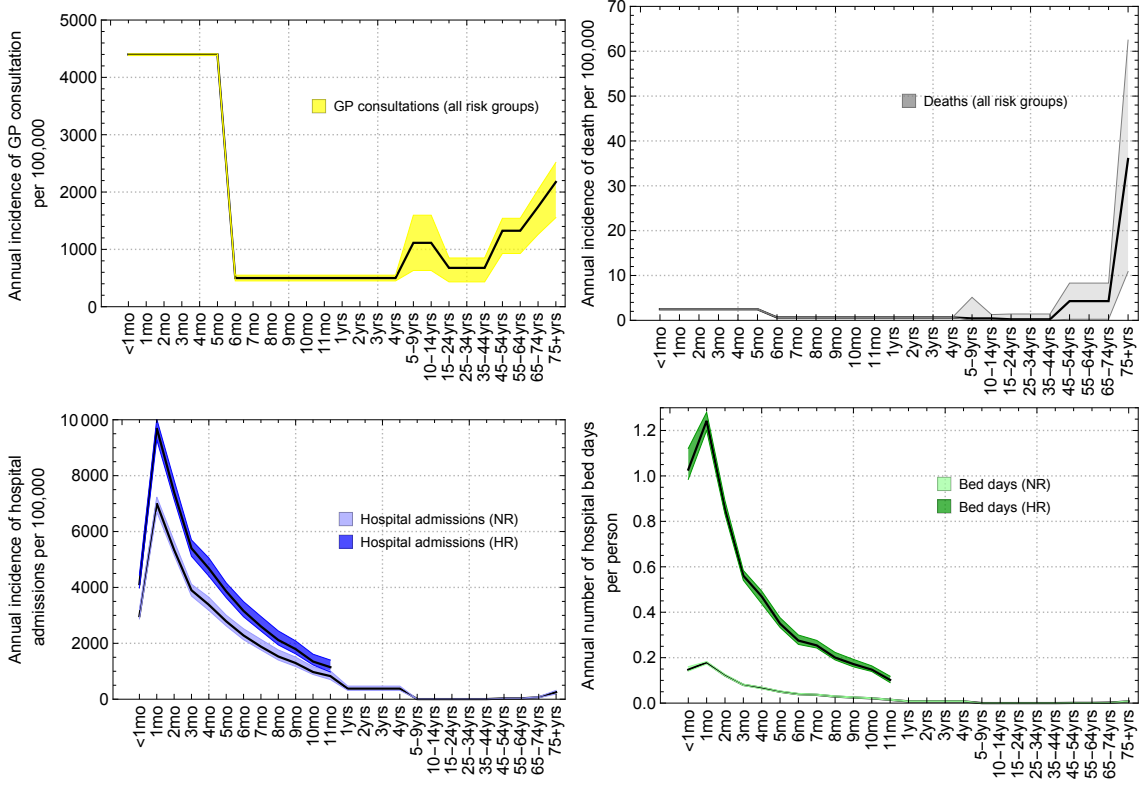

**Figure S1.10:** Estimated annual incidence of GP consultations (top left), deaths (top right), hospital admission (bottom left) and number of bed days (bottom right) per 100,000 persons in each age group (x-axis) and clinical risk group.

### S1.5.2 QALY loss due to death

Assuming an average life expectancy per person of 81.0 years,<sup>34</sup> then using SF-6D population norms with annual weighting of  $x_a$  per year,<sup>35</sup> the quality adjusted life expectancy is given by  $\sum_{a=0}^{81} x_a = 65.94$ . Given death occurs at year of life  $a_i$ , then the QALY loss, assuming a discounting rate of  $r = 0.035$ , is given by

$$\mathbb{E}[Q_D^{a_i}] = \sum_{a=a_i}^{81} x_a \exp(-0.035(a - a_i)) \quad (\text{S1.24})$$

We assume that the standard deviation of the life expectancy at age  $a_i$  is 10% of the current life expectancy ( $Q_D^{a_i} \sim \mathcal{N}(\mathbb{E}[Q_D^{a_i}], 0.1(\mathbb{E}[Q_D^{a_i}]))$ ).

### S1.5.3 Cost-effectiveness

If  $X$  is the prophylactic associated with intervention programme  $P$ , then the cost of treatment ( $\Theta^P$ ), cost of administration ( $\Delta^P$ ) cost of purchasing ( $B^P$ ) and the total QALY loss ( $Q^P$ ) associated with each treatment over the time horizon is given by:

$$\Theta^P = \sum_{w=1}^{52*T} Z_{P,t_w}^{a,r} (r_G^a \Theta_{GP} + r_B^{a,r} \Theta_H^a) e^{-rw/52} \quad (\text{S1.25})$$

$$\Delta^P = \Delta_X \sum_{w=1}^{52*T} D_{P,t_w}^{a,r} e^{-rw/52} \quad (\text{S1.26})$$

$$B^P = \rho_X \sum_{w=1}^{52*T} D_{P,t_w}^{a,r} e^{-rw/52} \quad (\text{S1.27})$$

$$Q^P = \sum_{w=1}^{52*T} Z_{P,t_w}^{a,r} (r_S^a Q_G + r_H^{a,r} Q_H^a + r_D^{a,r} Q_D^a) e^{-rw/52} \quad (\text{S1.28})$$

The formula for the maximum price per dose to implement programme  $P$  in an existing programme  $C$  to remain cost-effective at an 20,000£/QALY threshold is given by:

$$\rho(P, C) = \frac{20000(Q^C - Q^P) - (\Theta^P - \Theta^C) - (\Delta^P - \Delta^C)}{\sum_{w=1}^{52*T} D_{P,t_w}^{a,r} e^{-rw/52} - \sum_{w=1}^{52*T} D_{C,t_w}^{a,r} e^{-rw/52}} \quad (\text{S1.29})$$

## **S2. Supplementary information 2: Results**

## S2.1 Model choice

Calculating the DIC for the 10 proposed model choices (two maternal immunity and five detection models) suggests that dynamic maternal immunity with an exponential detection model best fits the data (**Figure S2.1**). For all five of the detection models considered, the dynamic immunity model better fitted the data than the static immunity model. The corresponding values for  $p_R$  and the detection probability is given in (**Figure S2.2**). The results which follow this section all refer to this model choice.

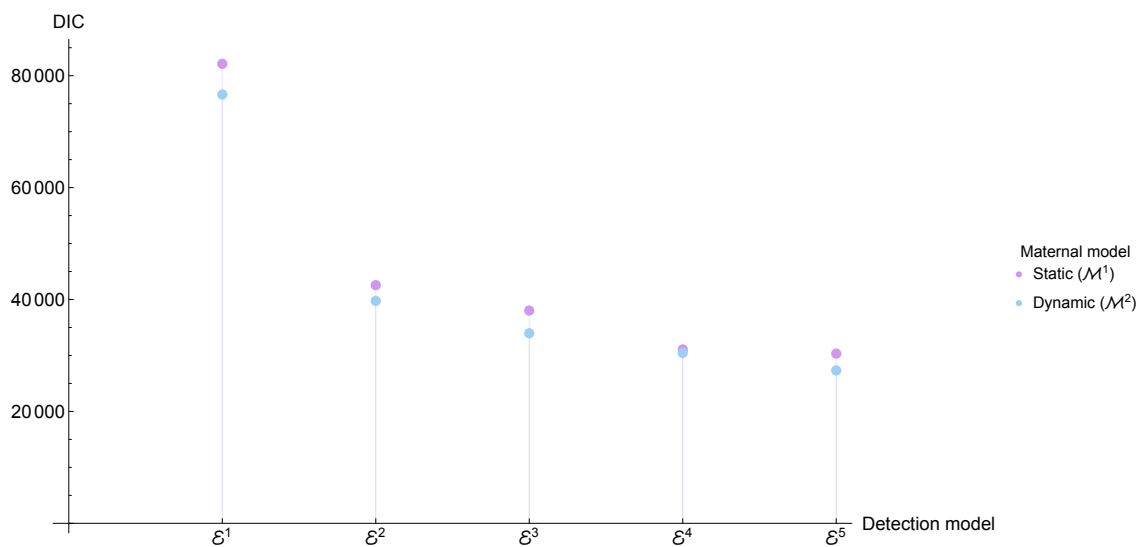

**Figure S2.1:** DIC for the 5 detection model structures, and the 2 maternal immunity model structures. Best fitting model is the exponential detection model ( $\mathcal{E}^5$ ) with the dynamic maternal immunity model ( $\mathcal{M}^2$ ).

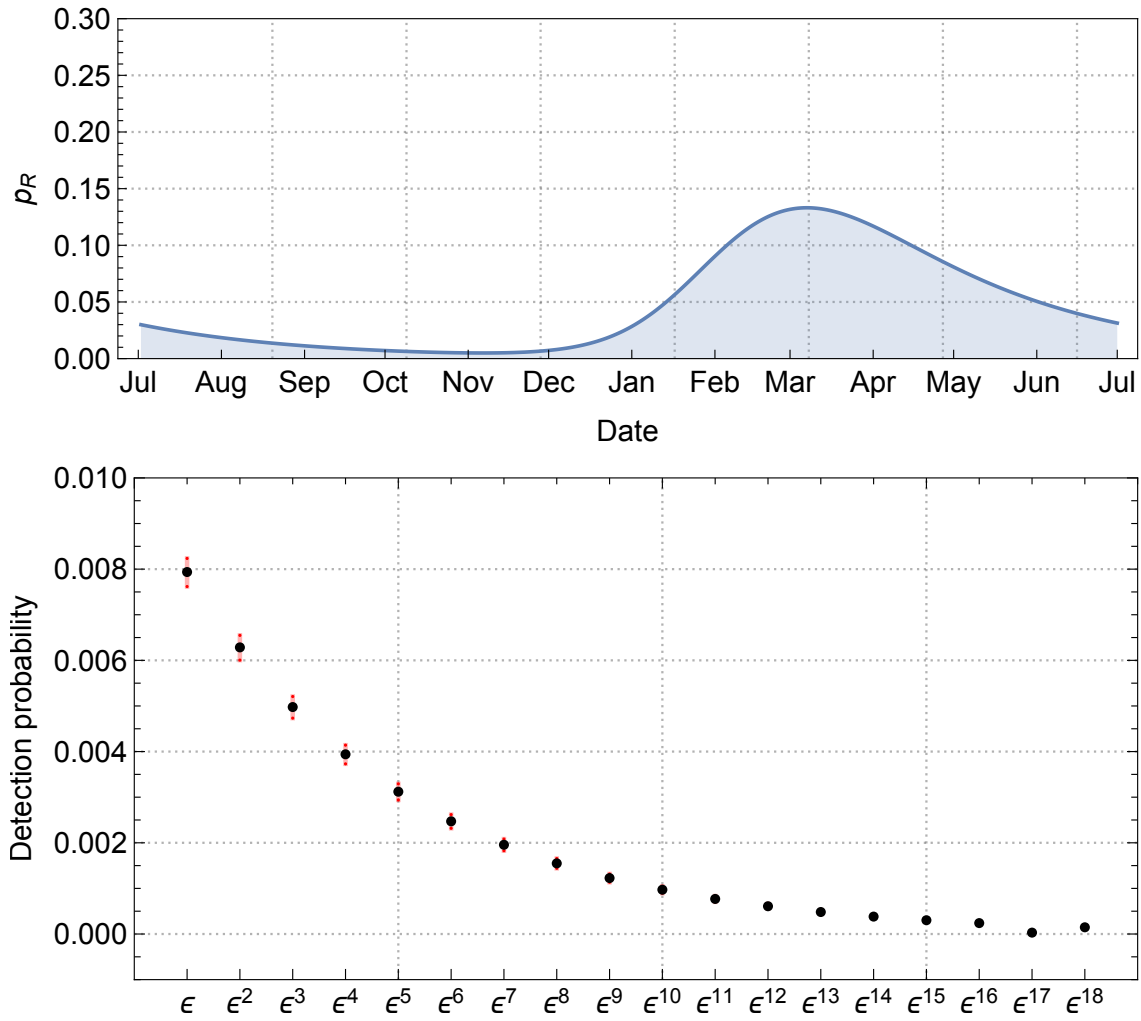

**Figure S2.2:** Top: The proportion of infants born with protection ( $p_R$ ) over an epidemic season for the dynamic maternal immunity model. Bottom: A comparison of the posterior distributions for the detection model,  $\mathcal{E}^5$ , where black points indicates the mean values and the red points indicated the lower and upper credible intervals

## S2.2 RSV Epidemiology

### S2.2.1 Estimated incidence

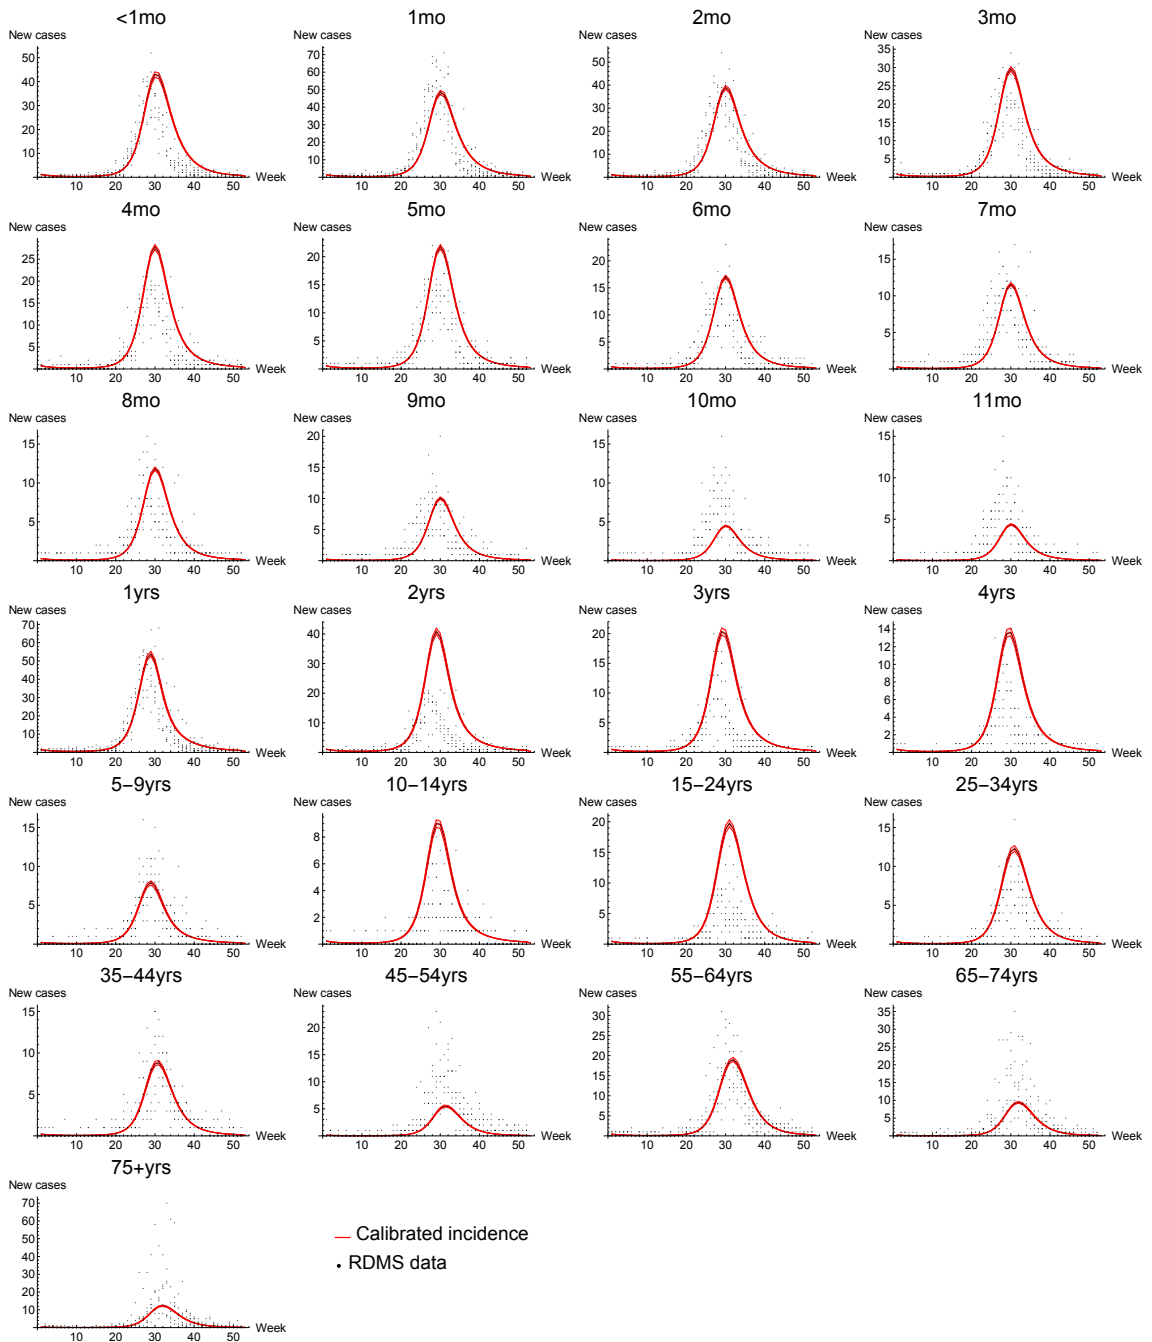

**Figure S2.3:** A comparison between the model-predicted number of detected samples during week  $t$ , ( $Z_{w_t}^a \epsilon^a$ , red line), estimated from averaging 1,000 samples from the posterior distribution during the third year of simulation, and the annual number of positive samples from RDMS ( $d_{w_t}^a$ , black dots) for age group  $a$ .



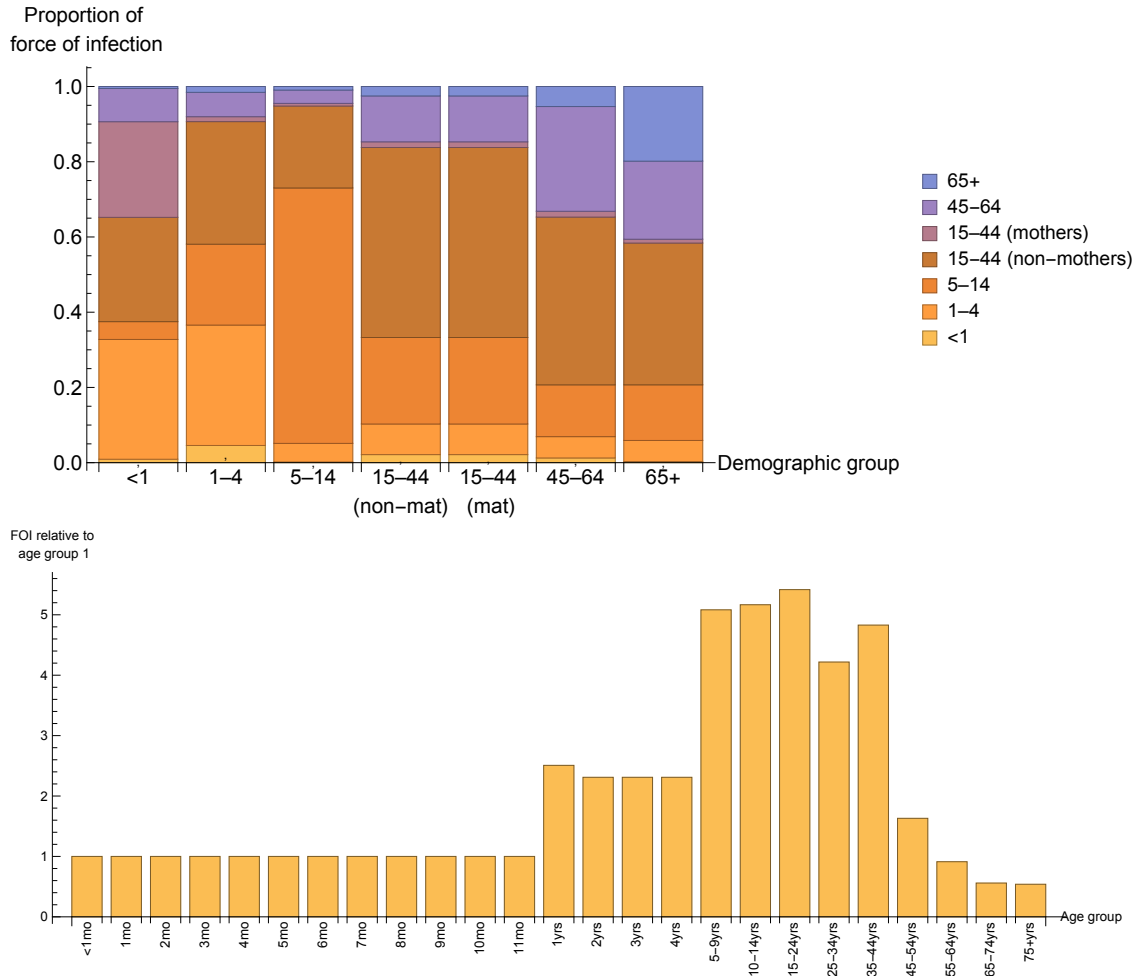

**Figure S2.4:** Top: the source of the infection for each demographic group in the analysis. Bottom: The magnitude of the force of infection relative to age group 1. The force of infection for both Figures was estimated using the third year of simulation

## S2.2.2 Posterior distributions of epidemic parameters

Model parameters ( $\mathcal{M}^2, \mathcal{E}^5$ )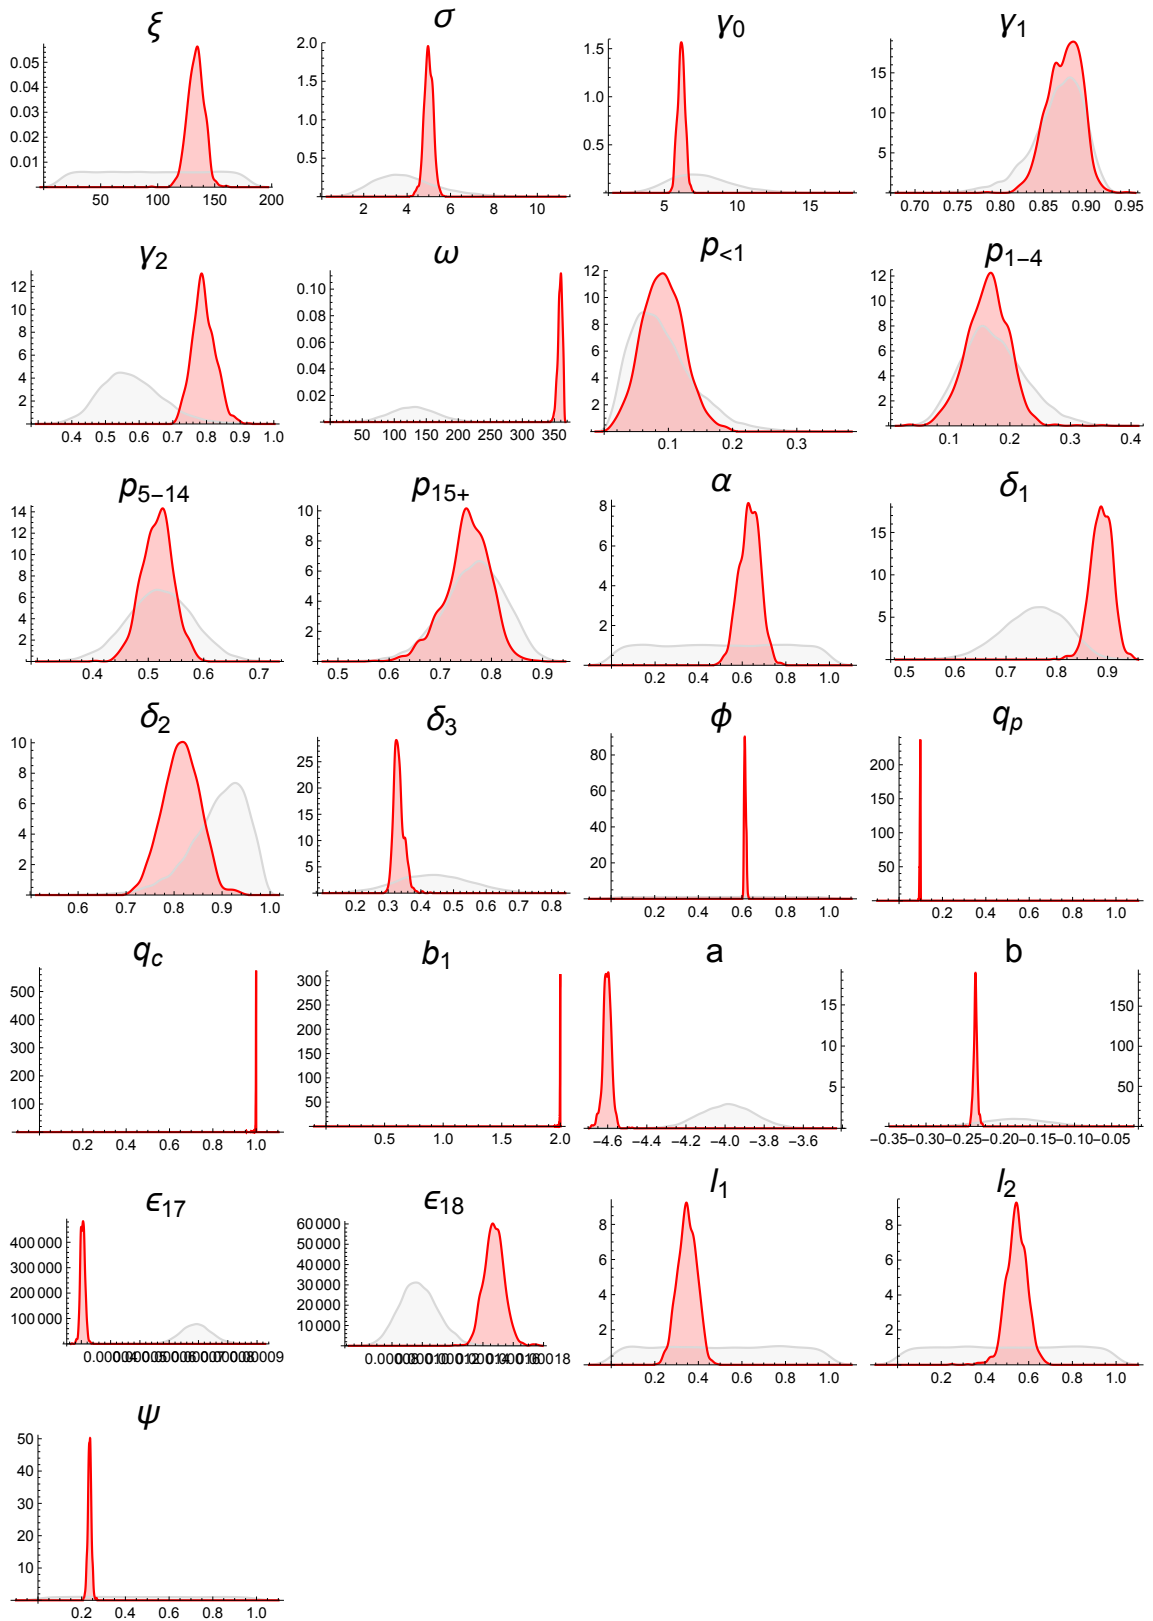

**Figure S2.5:** Smooth histogram plots comparing the the prior (gray) and posterior (red) distributions for each of the inferred parameters

## S2.3 Probability of clinical outcomes

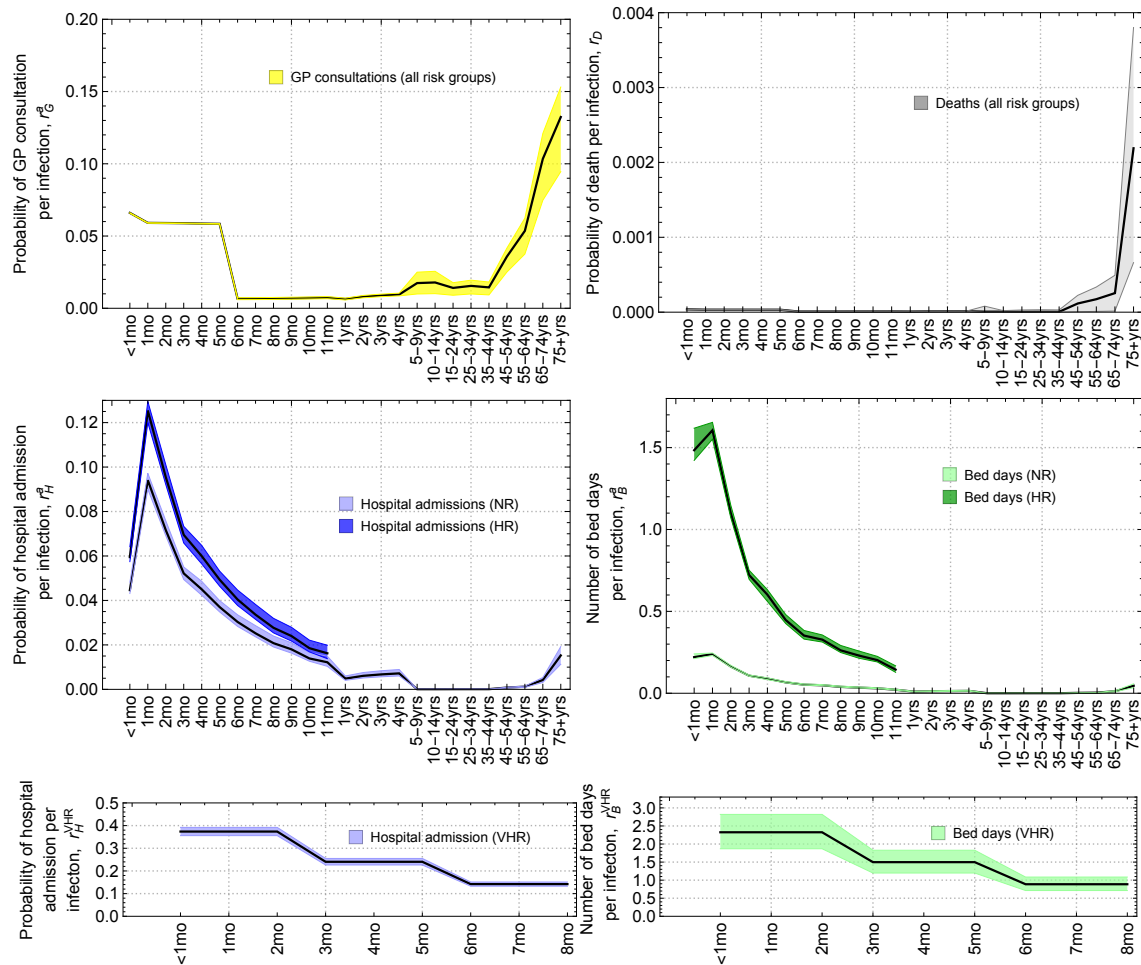

**Figure S2.6:** Estimated per-infection probability of GP consultations (top left), deaths (top right), hospital admission (bottom left) and number of bed days (bottom right) in each age group (x-axis) and clinical risk group.

## S2.4 Impact of intervention programmes

### S2.4.1 Optimal period of administration

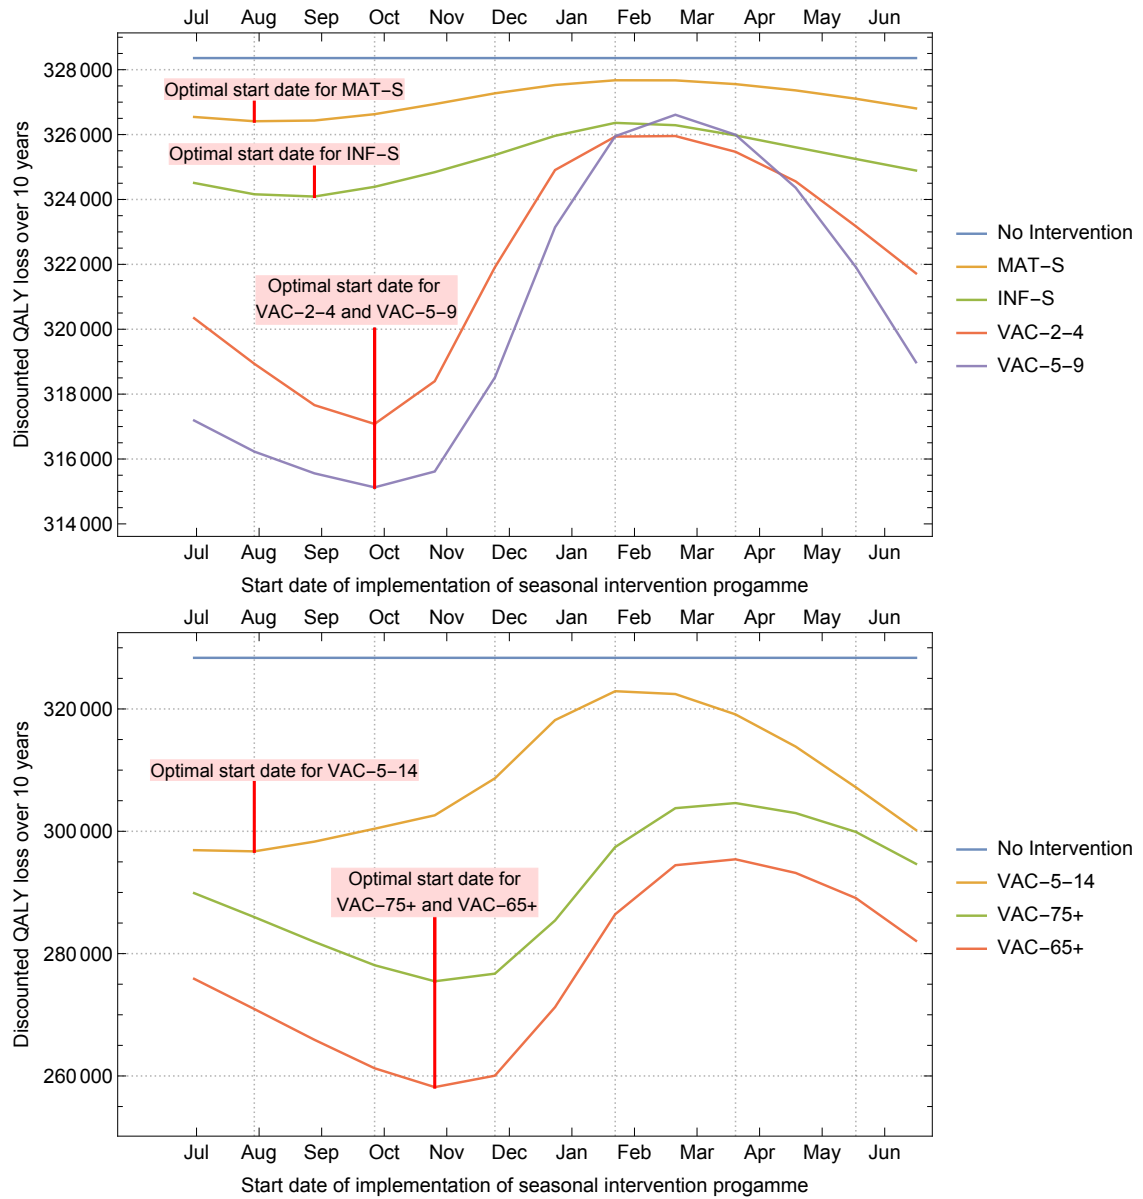

**Figure S2.7:** The total discount QALY loss over ten years when a seasonal programme starts administration on the month given on the x-axis.

## S2.4.2 Outcomes averted

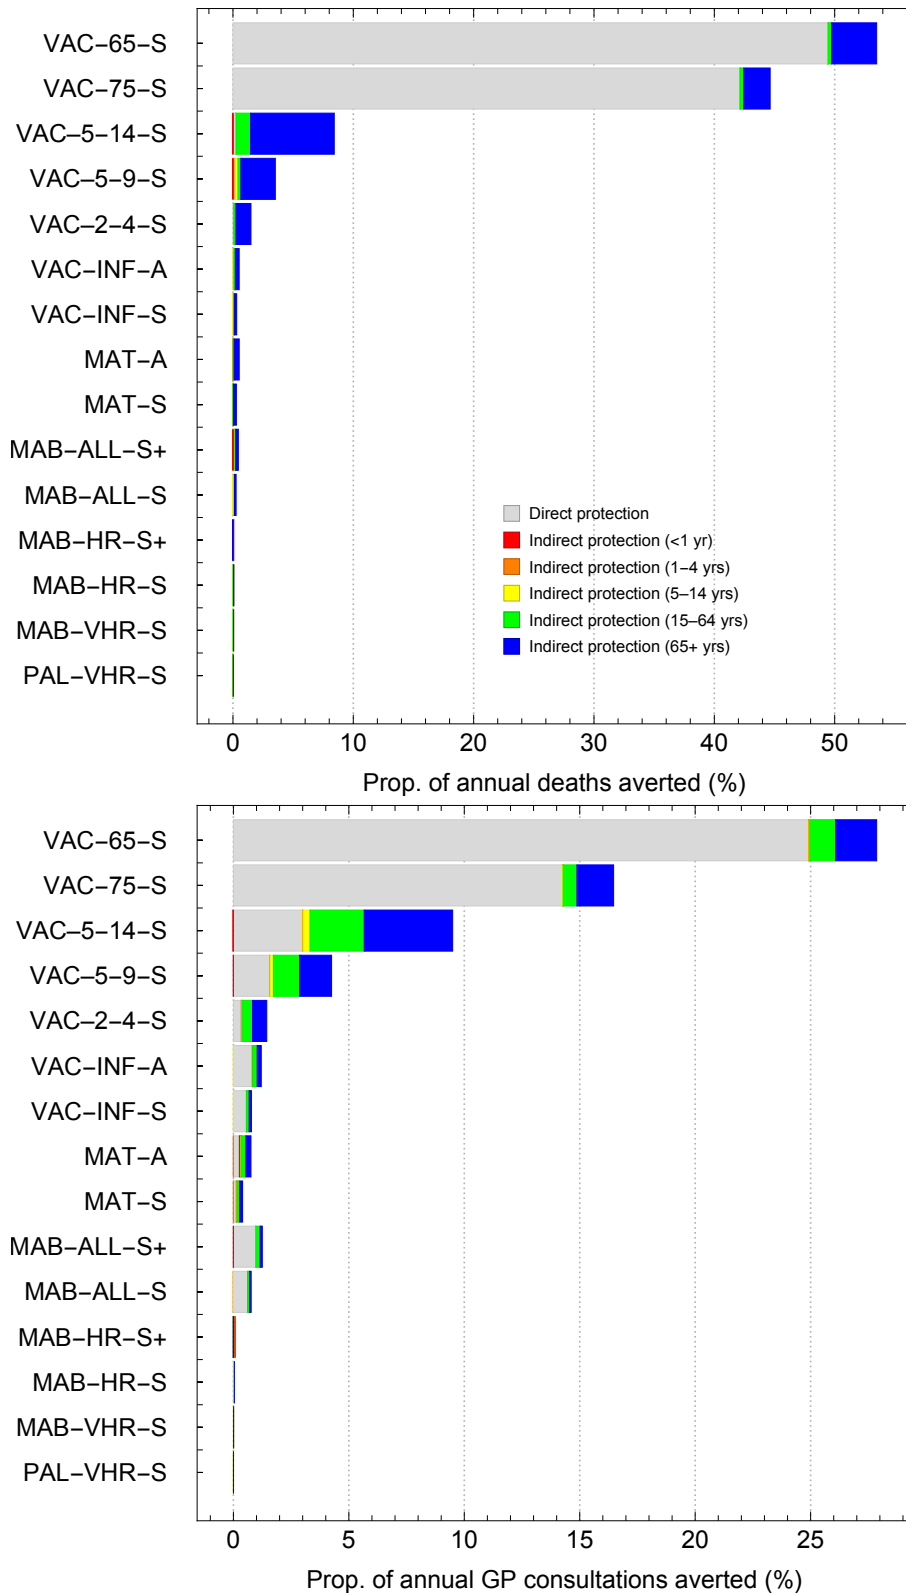

**Figure S2.8:** Impact of intervention programmes at preventing total proportion of RSV-related deaths. Gray segments of bars show direct protection and coloured segments of bars indicate indirect protection.

# Bibliography

- <sup>1</sup> Office for National Statistics. Births in England and Wales: 2017, 2018.
- <sup>2</sup> Lone Graff Stensballe, Henrik Ravn, Kim Kristensen, Kenneth Agerskov, Tiffany Meakins, Peter Aaby, and E. a F Simões. Respiratory syncytial virus neutralizing antibodies in cord blood, respiratory syncytial virus hospitalization, and recurrent wheeze. *J Allergy Clin Immunol*, 123(2):398–403, 2009.
- <sup>3</sup> Joel Mossong, Niel Hens, Mark Jit, Philippe Beutels, Kari Auranen, Rafael Mikolajczyk, Marco Massari, Stefania Salmaso, Gianpaolo Scalia Tomba, Jacco Wallinga, Janneke Heijne, and Malgorzata Sadkowska-todys. Social contacts and mixing patterns relevant to the spread of infectious diseases. *PLoS Med*, 5(3):e74, 2008.
- <sup>4</sup> Albert Jan van Hoek, Nick Andrews, Helen Campbell, Gayatri Amirthalingam, W. John Edmunds, and Elizabeth Miller. The Social Life of Infants in the Context of Infectious Disease Transmission; Social Contacts and Mixing Patterns of the Very Young. *PLoS ONE*, 8(10):1–7, 2013.
- <sup>5</sup> Paul D. Scott, Rachel Ochola, Mwanajuma Ngama, Emelda A. Okiro, D. James Nokes, Graham F. Medley, and Patricia A. Cane. Molecular Analysis of Respiratory Syncytial Virus Re-infections in Infants from Coastal Kenya. *The Journal of Infectious Diseases*, 193(1):59–67, 2006.
- <sup>6</sup> C B Hall, E E Walsh, C E Long, and K C Schnabel. Immunity to and frequency of reinfection with respiratory syncytial virus. *J Infect Dis*, 163(4):693–698, 1991.
- <sup>7</sup> M M Ogilvie, A S Vathenen, M Radford, J Codd, and S Key. Maternal antibody and respiratory syncytial virus infection in infancy. *J Med Virol*, 7:263–271, 1981.
- <sup>8</sup> W. P. Glezen, A. Paredes, J. E. Allison, L. H. Taber, and A. L. Frank. Risk of respiratory syncytial virus infection for infants from low-income families in relationship to age, sex, ethnic group, and maternal antibody level. *J Pediatr*, 98(5):708–715, 1981.
- <sup>9</sup> Rachel Ochola, Charles Sande, Gregory Fegan, Paul D. Scott, Graham F. Medley, Patricia A. Cane, and D. James Nokes. The level and duration of RSV-specific maternal IgG in infants in Kilifi Kenya. *PLoS ONE*, 4(12):4–9, 2009.
- <sup>10</sup> John P. DeVincenzo, Tom Wilkinson, Akshay Vaishnav, Jeff Cehelsky, Rachel Meyers, Saraswathy Nochur, Lisa Harrison, Patricia Meeking, Alex Mann, Elizabeth Moane, John Oxford, Rajat Pareek, Ryves Moore, Ed Walsh, Robert Studholme, Preston Dorsett, Rene Alvarez, and Robert Lambkin-Williams. Viral load drives disease in humans experimentally infected with respiratory syncytial virus. *Am J Resp Crit Care*, 182(10):1305–1314, 2010.
- <sup>11</sup> Emelda A. Okiro, Lisa J. White, Mwanajuma Ngama, Patricia A. Cane, Graham F. Medley, and D. James Nokes. Duration of shedding of respiratory syncytial virus in a community study of Kenyan children. *BMC Infectious Diseases*, 10:15, 2010.

- 
- <sup>12</sup> Frederick W Henderson, Albert M Collier, Wallace A Clyde, and Floyd W Denny. Respiratory-Syncytial-Virus infections, refinctions and immunity: A prospective, longitudinal study in young children. *New England Journal of Medicine*, 290(14), 1974.
- <sup>13</sup> P. J. Watt, B. S. Robinson, C. R. Pringle, and D. A J Tyrrel. Determinants of susceptibility to challenge and the antibody response of adult volunteers given experimental respiratory syncytial virus vaccines. *Vaccine*, 8(3):231–236, 1990.
- <sup>14</sup> Patrick K. Munywoki, Dorothy C. Koech, Charles N. Agoti, Ann Bett, Patricia A. Cane, Graham F. Medley, and D. James Nokes. Frequent Asymptomatic Respiratory Syncytial Virus Infections during an Epidemic in a Rural Kenyan Household Cohort. *Journal of Infectious Diseases*, 212(10):1711–1718, 2015.
- <sup>15</sup> H. Zhao, H. Green, A. Lackenby, M. Donati, J. Ellis, C. Thompson, A. Bermingham, J. Field, P. Sebastian Pillai, M. Zambon, J. M. Watson, and R. Pebody. A new laboratory-based surveillance system (Respiratory Datamart System) for influenza and other respiratory viruses in England: Results and experience from 2009 to 2012. *Eurosurveillance*, 19(3):1–10, 2014.
- <sup>16</sup> W P Glezen, L H Taber, A L Frank, and J A Kasel. Risk of primary infection and reinfection with respiratory syncytial virus. *Am J Dis Child*, 140(6):543–6, 1986.
- <sup>17</sup> Rachel Melanie Reeves, Pia Hardelid, Ruth Gilbert, Fiona Warburton, Joanna Ellis, and Richard G Pebody. Estimating the burden of respiratory syncytial virus (RSV) on respiratory hospital admissions in children less than five years of age in England, 2007-2012. *Influenza Other Respi Viruses*, 11(3):122–129, 2017.
- <sup>18</sup> B B La, Zej Miasojedow, Eric Moulines And, and Matti Vihola. Adaptive Parallel Tempering Algorithm. Technical report, 2012.
- <sup>19</sup> John P. Cunningham, Philipp Hennig, and Simon Lacoste-Julien. Gaussian Probabilities and Expectation Propagation. 2:1–56, 2011.
- <sup>20</sup> NHS. Clinical Commissioning Policy: Palivizumab To Reduce The Risk Of RSV In High Risk Infants NHS Commissioning Board Clinical Commissioning Policy: Palivizumab To Reduce The Risk Of Respiratory Syncytial Virus (RSV) In High Risk Infants. Technical report, 2012.
- <sup>21</sup> Martina A Steurer, Rebecca J Baer, Roberta L Keller, Scott Oltman, Christina D Chambers, Mary E Norton, Shabnam Peyvandi, Larry Rand, Satish Rajagopal, Kelli K Ryckman, Anita J Moon-Grady, and Laura L Jelliffe-Pawlowski. Gestational Age and Outcomes in Critical Congenital Heart Disease. *Pediatrics*, 140(4):e20170999, oct 2017.
- <sup>22</sup> Christopher S Ambrose, Xiaohui Jiang, and Kunjana Mavunda. 737. The Prevalence of Diagnosed Chronic Lung Disease in US Infants by Gestational Age: Implications for RSV Policy. *Open Forum Infectious Diseases*, 5(suppl\_1):S264–S265, 2018.
- <sup>23</sup> Christopher A Green, David Yeates, Allie Goldacre, Charles Sande, Roger C Parslow, Philip McShane, Andrew J Pollard, and Michael J Goldacre. Admission to hospital for bronchiolitis in England: trends over five decades, geographical variation and association with perinatal characteristics and subsequent asthma. *Archives of disease in childhood*, 101(2):140–6, feb 2016.
- <sup>24</sup> Marc Baguelin, Stefan Flasche, Anton Camacho, Nikolaos Demiris, Elizabeth Miller, and W. John Edmunds. Assessing optimal target populations for influenza vaccination programmes: an evidence synthesis and modelling study. *PLoS Med*, 10(10), 2013.
- <sup>25</sup> Office for National Statistics. Births by parents’ characteristics: 2017, 2019.

- <sup>26</sup> Katherine E. Atkins, Meagan C. Fitzpatrick, Alison P. Galvani, and Jeffrey P. Townsend. Cost-Effectiveness of Pertussis Vaccination During Pregnancy in the United States. *American Journal of Epidemiology*, 183(12):1159–1170, jun 2016.
- <sup>27</sup> Deborah Cromer, Albert Jan van Hoek, Anthony T Newall, Andrew J Pollard, and Mark Jit. Burden of paediatric respiratory syncytial virus disease and potential effect of different immunisation strategies: a modelling and cost-effectiveness analysis for England. *The Lancet Public Health*, 2(8):e367–e374, aug 2017.
- <sup>28</sup> Douglas M. Fleming, Robert J. Taylor, Roger L. Lustig, Cynthia Schuck-Paim, François Haguinet, David J Webb, John Logie, Gonçalo Matias, and Sylvia Taylor. Modelling estimates of the burden of Respiratory Syncytial virus infection in adults and the elderly in the United Kingdom. *BMC Infec Dis*, 15(1):443, 2015.
- <sup>29</sup> S Taylor, RJ Taylor, RL Lustig, C Schuck-Paim, F Haguinet, DJ Webb, J Logie, Matias G, and Fleming DM. Modelling estimates of the burden of respiratory syncytial virus infection in children in the UK. *BMJ Open*, 6:e009337, 2016.
- <sup>30</sup> R.M. Reeves, P. Hardelid, N. Panagiotopoulos, M. Minaji, F. Warburton, and R. Pebody. Burden of hospital admissions caused by respiratory syncytial virus (RSV) in infants in England: a data linkage modelling study. *Journal of Infection*, feb 2019.
- <sup>31</sup> Pia Hardelid, Maximiliane Verfuenden, Jim McMenamin, Rosalind Smyth, and Ruth Gilbert. The contribution of child, family and health service factors to respiratory syncytial virus (RSV) hospital admissions in the first 3 years of life: birth cohort study in Scotland, 2009 to 2015. *Eurosurveillance*, 2019.
- <sup>32</sup> A Study to Evaluate the Safety of MEDI8897 for the Prevention of Medically Attended Respiratory Syncytial Virus(RSV) Lower Respiratory Track Infection (LRTI) in High-risk Children.
- <sup>33</sup> Kyle Widmer, Yuwei Zhu, John V Williams, Marie R Griffin, Kathryn M Edwards, and H Keipp Talbot. Rates of hospitalizations for respiratory syncytial virus, human metapneumovirus, and influenza virus in older adults. *The Journal of infectious diseases*, 206(1):56–62, jul 2012.
- <sup>34</sup> ONS. National life tables, UK - Office for National Statistics, 2018.
- <sup>35</sup> Berg Bernard. SF-6D Population Norms. 2012.
- <sup>36</sup> M Baguelin, K Hoschler, E Stanford, P Waight, and P Hardelid. Age-Specific Incidence of A/H1N1 2009 Influenza Infection in England from Sequential Antibody Prevalence Data Using Likelihood-Based Estimation. *PLoS ONE*, 6(2):17074, 2011.
- <sup>37</sup> Stephen P Brooks and Andrew Gelman. General Methods for Monitoring Convergence of Iterative Simulations. *Journal of Computational and Graphical Statistics*, 7(4):434–455, 1998.
- <sup>38</sup> Green Book Chapter. *Respiratory syncytial virus: the green book, chapter 27a*. 2015.
- <sup>39</sup> Lesley A Curtis and Amanda Burns. Unit Costs of Health and Social Care 2018. Technical report, University of Kent, 2018.
- <sup>40</sup> ESPID. Tweet from 11th May, 2019.
- <sup>41</sup> GlaxoSmithKline. RSV Investigational Vaccine in RSV-seropositive Infants Aged 12 to 23 Months, 2019.



- 
- <sup>42</sup> Christopher A Green, David Yeates, Allie Goldacre, Charles Sande, Roger C Parslow, Philip Mcshane, Andrew J Pollard, and Michael J Goldacre. Admission to hospital for bronchiolitis in England: trends over five decades, geographical variation and association with perinatal characteristics and subsequent asthma.
- <sup>43</sup> F D Richard Hobbs, Clare Bankhead, Toqir Mukhtar, Sarah Stevens, Rafael Perera-Salazar, Tim Holt, Chris Salisbury, and National Institute for Health Research School for Primary Care Research. Clinical workload in UK primary care: a retrospective analysis of 100 million consultations in England, 2007-14. *Lancet (London, England)*, 387(10035):2323–2330, jun 2016.
- <sup>44</sup> C L Lamprecht, H E Krause, and M A Mufson. Role of maternal antibody in pneumonia and bronchiolitis due to respiratory syncytial virus. *J Infect Dis*, 134(3):211–7, 1976.
- <sup>45</sup> MedImmune LLC. A Study to Evaluate the Safety and Efficacy of MEDI8897 for the Prevention of Medically Attended RSV LRTI in Healthy Preterm Infants. (MEDI8897 Ph2b), 2019.
- <sup>46</sup> Natalie I Mazur, Deborah Higgins, Marta C Nunes, José A Melero, Anneffleur C Langedijk, Nicole Horsley, Ursula J Buchholz, Peter J Openshaw, Jason S McLellan, Janet A Englund, Asuncion Mejias, Ruth A Karron, Eric Af Simões, Ivana Knezevic, Octavio Ramilo, Pedro A Piedra, Helen Y Chu, Ann R Falsey, Harish Nair, Leyla Kragten-Tabatabaie, Anne Greenough, Eugenio Baraldi, Nikolaos G Papadopoulos, Johan Vekemans, Fernando P Polack, Mair Powell, Ashish Satav, Edward E Walsh, Renato T Stein, Barney S Graham, Louis J Bont, and Respiratory Syncytial Virus Network (ReSViNET) Foundation. The respiratory syncytial virus vaccine landscape: lessons from the graveyard and promising candidates. *The Lancet. Infectious diseases*, 18(10):e295–e311, oct 2018.
- <sup>47</sup> Harish Nair, D James Nokes, Bradford D Gessner, Mukesh Dherani, Shabir A Madhi, Rosalyn J Singleton, Katherine L O’Brien, Anna Roca, Peter F Wright, Nigel Bruce, Aruna Chandran, Evropi Theodoratou, Agustinus Sutanto, Endang R Sedyaningsih, Mwanajuma Ngama, Patrick K Munywoki, Cissy Kartasasmita, Eric AF F Simões, Igor Rudan, Martin W Weber, and Harry Campbell. Global burden of acute lower respiratory infections due to respiratory syncytial virus in young children: a systematic review and meta-analysis. *Lancet*, 375(9725):1545–1555, 2010.
- <sup>48</sup> NHS Improvement. Reference costs, 2018.
- <sup>49</sup> Novavax. A Phase 3, Randomized, Observer-Blind, Placebo-Controlled, Group-Sequential Study to Determine the Immunogenicity and Safety of a Respiratory Syncytial Virus (RSV) F Nanoparticle Vaccine With Aluminum in Healthy Third-trimester Pregnant Women; and Safety, 2017.
- <sup>50</sup> PATH. RSV vaccine and mAB snapshot, 2019.
- <sup>51</sup> PHE. Seasonal flu vaccine uptake in GP patients: monthly data, 2018 to 2019 - GOV.UK, 2019.
- <sup>52</sup> PHE. Estimates of RSV hospitalisation. *Not published*.
- <sup>53</sup> PHE. Quarterly vaccination coverage statistics for children aged up to five years in the UK (COVER programme) : October to. Technical report, 2017.
- <sup>54</sup> PHE. RSV coverage rates. *Not published*.
- <sup>55</sup> Public Health England. Seasonal influenza vaccine uptake in GP patients. Technical report, 2019.
- <sup>56</sup> Public Health England. Quarterly vaccination coverage statistics for children aged up to five years in the UK (COVER programme) : October to. Technical report, 2017.
-

- <sup>57</sup> D. Wang, C. Cummins, S. Bayliss, J. Sandercock, and A. Burls. Immunoprophylaxis against respiratory syncytial virus (RSV) with palivizumab in children: A systematic review and economic evaluation. *Health Technology Assessment*, 12(36), 2008.
- <sup>58</sup> ABHI. NICE, Affordability, and the NHS. Technical report, 2017.
- <sup>59</sup> Evan J Anderson, Phyllis Carosone-Link, Ram Yogev, Jumi Yi, and Eric A F Simões. Effectiveness of Palivizumab in High-risk Infants and Children. 2017.
- <sup>60</sup> Novavax. Prepare<sup>TM</sup> Trial Topline Results. Technical report, 2019.
- <sup>61</sup> Public Health England. Pertussis vaccination programme for pregnant women update: vaccine coverage in England, January to March 2019 and 2018/19 annual coverage. Technical report, 2019.
- <sup>62</sup> NICE. Guide to the methods of technology appraisal. Technical report, 2013.
- <sup>63</sup> Joseph B. Domachowske, Anis A. Khan, Mark T. Esser, Kathryn Jensen, Therese Takas, Tonya Villafana, Filip Dubovsky, and M. Pamela Griffin. Safety, Tolerability, and Pharmacokinetics of MEDI8897, an Extended Half-Life Single-Dose Respiratory Syncytial Virus Prefusion F-Targeting Monoclonal Antibody Administered as a Single Dose to Healthy Preterm Infants. *The Pediatric Infectious Disease Journal*, 37:886–892, 2018.
- <sup>64</sup> R M Reeves, P Hardelid, R Gilbert, J Ellis, H Zhao, M Donati, and R Pebody. Epidemiology of laboratory-confirmed respiratory syncytial virus infection in young children in England, 2010-2014: the importance of birth month. *Epidemiol Infect*, 144(10):2049–56, 2016.
- <sup>65</sup> P. Hardelid, R. Pebody, and N. Andrews. Mortality caused by influenza and respiratory syncytial virus by age group in England and Wales 1999-2010. *Influenza and Other Respiratory Viruses*, 7(1):35–45, jan 2013.
